# Sex differences in the nasal microbiome of healthy young adults

Yanmei Ju<sup>1,2,3,\*</sup>, Zhe Zhang<sup>1,2,\*</sup>, Mingliang Liu<sup>1,2,3,\*</sup>, Shutian Lin<sup>1,2,3</sup>, Qiang Sun<sup>1,2,6</sup>,  
Zewei Song<sup>1</sup>, Weiting Liang<sup>1,2</sup>, Xin Tong<sup>1,2</sup>, Zhuye Jie<sup>1,2</sup>, Haorong Lu<sup>7</sup>, Kaiye Cai<sup>1</sup>,  
Peishan Chen<sup>1</sup>, Xin Jin<sup>1</sup>, Xun Xu<sup>1</sup>, Huanming Yang<sup>1,8</sup>, Jian Wang<sup>1,8</sup>, Yong Hou<sup>1</sup>, Liang  
Xiao<sup>1,3,5</sup>, Huijue Jia<sup>9,10,†</sup>, Tao Zhang<sup>1,2,†</sup>, Ruijin Guo<sup>1,2,†</sup>

<sup>1</sup> BGI-Shenzhen, Shenzhen 518083, China

<sup>2</sup> Shenzhen Key Laboratory of Human Commensal Microorganisms and Health Research,  
BGI-Shenzhen, Shenzhen 518083, China

<sup>3</sup> College of Life Sciences, University of Chinese Academy of Sciences, Beijing 100049,  
China

<sup>4</sup> Shenzhen Engineering Laboratory of Detection and Intervention of human intestinal  
microbiome, BGI-Shenzhen, Shenzhen 518083, China

<sup>5</sup> BGI-Qingdao, BGI-Shenzhen, Qingdao 266555, China

<sup>6</sup> Department of Statistical Sciences, University of Toronto, 700 University Ave, Toronto,  
ON M5G 1Z5 Canada

<sup>7</sup> China National Genebank, BGI-Shenzhen, Shenzhen, Guangdong, China

<sup>8</sup> James D. Watson Institute of Genome Sciences, Hangzhou, Zhejiang, China

<sup>9</sup> School of Life Sciences, Fudan University, Shanghai, China

<sup>10</sup> Greater Bay Area Institute of Precision Medicine, Guangzhou, Guangdong, China

\* These authors contributed equally to this work.

† Correspondence should be addressed to R. G. ([guoruijin@genomics.cn](mailto:guoruijin@genomics.cn)), T.Z.  
([tao.zhang@genomics.cn](mailto:tao.zhang@genomics.cn)) or H. J. ([jiahuijue@ipm-gba.org.cn](mailto:jiahuijue@ipm-gba.org.cn)).

# Summary

**Respiratory diseases impose an immense health burden worldwide. Epidemiological studies have revealed extensive disparities in the incidence and severity of respiratory tract infections (RTIs) between males and females.** It is recently hypothesized that there might also be a nasal microbiome axis contributing to the observed sex disparities, but without evidence. In this work, we study the **nasal microbiome of healthy young adults** in, as of today, **the largest cohort** based on deep shot-gun metagenomic sequencing. We mainly focus on the bacteriome, but also integrate the mycobiome to get a more holistic perspective. **De novo assembly** is performed to catalog the nasal bacterial colonizers/residents, which also **identify and therefore account for uncharacterized components** of the community. The bacteriome is then profiled based on the non-redundant metagenome-assembled genomes (**MAGs**) **catalog** constructed therefrom. Unsupervised clustering reveals clearly separable structural patterns in the nasal microbiome between the two sexes. Following this link, we **systematically evaluate sex differences for the first time and reveal extensive sex-specific features in the nasal microbiome composition. More importantly, through network analyses, we capture markedly higher ecological stability and antagonistic potentials in the nasal microbiome of females than that of males. The analysis of the keystone bacteria of the communities reveal that the sex-dependent evolutionary characteristics might have contributed to this difference.**

# Highlights

The non-redundant nasal bacterial MAGs catalog constructed from ultra-deeply sequenced metagenomic data provides a valuable resource.

Integrating nasal bacteriome and mycobiome data provides a more holistic perspective for the understudied human nasal microbiome.

Unsupervised clustering helps uncover extensive sex differences in the nasal microbiome compositions.

Network analyses capture markedly higher ecological stability and antagonistic potentials in the nasal microbiome of females than that of males.

Sex-dependent genetic evolutionary forces play a role in the shaping of keystones in the nasal microbial community.

# 1 Introduction

2 Respiratory diseases impose an immense health burden worldwide, affecting billions of  
 3 people's lives and accounting for over 10% of all disability-adjusted life-years (DALY)  
 4 as of 2019 according to the Global Burden of Diseases (GBD) study (Ferkol and  
 5 Schraufnagel, 2014; GBD 2019 Diseases and Injuries Collaborators, 2020; Jin et al., 2021;  
 6 Viegli et al., 2020), let alone the catastrophic impact of the COVID-19 pandemic. Sex is a  
 7 significant factor in many diseases. Epidemiological studies have revealed extensive  
 8 disparities in the incidence and severity of respiratory tract infections (RTIs) between  
 9 males and females. Males are generally more commonly and severely affected by most  
 10 RTIs than females across all age groups (Falagas et al., 2007; Jacobsen and Klein, 2021;  
 11 Jin et al., 2021). A greater mortality rate for males was also observed in COVID-19  
 12 (Klein et al., 2020; Scully et al., 2020; Vahidy et al., 2021). Sex-specific differences in  
 13 immunity mediated by sex chromosome complement, genes and sex hormones can play  
 14 important roles in the observed disparity (Jacobsen and Klein, 2021; Scully et al., 2020;  
 15 Vahidy et al., 2021). Nevertheless, the mechanism remains unclear. The nasal  
 16 microbiome has been implicated in different respiratory diseases (Fazlollahi et al., 2018;  
 17 Gan et al., 2021; Kumpitsch et al., 2019; Mahdavinia et al., 2016; Ramakrishnan and  
 18 Frank, 2018; Rhee et al., 2021; B. G. Wu et al., 2019). It is recently proposed that there  
 19 might also be a nasal microbiome axis contributing to the observed sex disparities (Shah,  
 20 2021).

21 The nasal bacterial community is characterized by a high prevalence of *Corynebacterium*  
 22 *spp.*, *Propionibacterium spp.* and *Staphylococcus spp.*, with most components belonging  
 23 to phyla Actinobacteria, Firmicutes and Proteobacteria (Human Microbiome Project  
 24 Consortium, 2012; C. M. Liu et al., 2015). In addition to bacterial colonizers, the nasal  
 25 cavity also harbors a mycobiota (Jung et al., 2015), as well as the presence of viruses.  
 26 However, the nasal microbiome studies are hitherto still limited to small sample sizes or  
 27 16S rRNA gene-based sequencing (Wenkui Dai et al., 2019; de Steenhuijsen Piters et al.,  
 28 2020; Earl et al., 2018; Kaul et al., 2020; C. M. Liu et al., 2015; Yan et al., 2013). Sex  
 29 differences in the nasal microbiome have never been systematically evaluated. Liu *et al.*  
 30 identified seven community state types (CSTs) of the nasal bacterial community in a  
 31 cohort of 86 twin pairs above 50 years old, and found no significant difference in the  
 32 CST distribution between the two sexes despite higher microbial loads in the nasal cavity  
 33 of males. This is not surprising considering that even in the most researched gut

1 microbiome, sex differences only came to light very recently through large-scale  
2 population studies (la Cuesta-Zuluaga et al., 2019; Sinha et al., 2018; X. Zhang et al.,  
3 2021). In a well-designed large cohort, which nicely limited variability in potential  
4 confounding factors, such as genetic background, geographic residence, and diet habits  
5 etc., Zhang et al. demonstrated sex-specific aging trajectories of the gut microbiome.  
6 They showed that the differences were especially evident between age-matched male  
7 adults and premenopausal female adults (approximately below ~50 years old), and  
8 gradually diminished after 50 years of age.

9 It is increasingly recognized that the nasal microbiome might function as a gatekeeper in  
10 respiratory health (Wenfang Dai et al., 2018; Man et al., 2017). The nasal cavity is  
11 featured by limited nutrients and adhesion surfaces (Krismer et al., 2014), and represents  
12 a major reservoir for opportunistic pathogens, such as *Staphylococcus aureus*,  
13 *Streptococcus pneumoniae*, and *Haemophilus influenzae* (Clark, 2020). The microbes in  
14 this niche are hence in constant competition, and sometimes form cooperative relation, to  
15 gain self-fitness (Brugger et al., 2020; De Boeck et al., 2021; Zipperer et al., 2016).  
16 Extensive antimicrobial substance productions have been identified in nasal microbes,  
17 which can be potential mediators of the interactions (De Boeck et al., 2021; Donia et al.,  
18 2014; Donia and Fischbach, 2015; Iwase et al., 2010; Janek et al., 2016; Zipperer et al.,  
19 2016). The competitive (antagonistic) and cooperative (synergistic) interactions influence  
20 both the initial colonization of pathogens and the thereafter dynamics. Network-based  
21 approaches have been proved to be helpful in deciphering complex interactions and are  
22 increasingly applied in the microbial field. Understanding the nature of microbial co-  
23 occurrence and correlation patterns within and cross domains may provide insights into  
24 the ecological systems as well as related human diseases. Through network-based  
25 analyses, researchers studying bronchiectasis exacerbations found that patients of  
26 different exacerbation risks featured distinct microbial interaction networks (Mac Aogáin  
27 et al., 2021). Instead of the implicated single pathobiont *Pseudomonas*, it is the  
28 interaction network that is associated with the exacerbation risk. While cross-domain  
29 interactions are rarely explored, Tipton et al. recently showed that compared to single  
30 domain networks, bacteria-fungi combined networks had higher overall connectivity and  
31 increased attack robustness (Tipton et al., 2018). More importantly, network analyses can  
32 help elucidate and prioritize the keystones of a community, which may not be the species  
33 dominant in abundance, and sometimes can even be unknown "microbial dark matter"  
34 (Banerjee et al., 2018; Zamkovaya et al., 2020).

In this work, we study the nasal microbiome of healthy young adults in a so far largest cohort based on deep shotgun metagenomic sequencing. We mainly focus on the bacteriome, but also integrate the mycobiome to get a more holistic perspective. De novo assembly is performed to catalog the nasal bacterial colonizers/residents, which also identify and therefore account for uncharacterized components of the community. The bacteriome is then profiled based on the non-redundant metagenome-assembled genomes (MAGs) catalog constructed therefrom. Unsupervised clustering reveals clearly separable patterns between the two sexes, implying a distinct structure of the nasal microbiome between males and females. Following this link, we systematically evaluate sex differences for the first time and reveal extensive sex-specific features in the nasal microbiome composition. More importantly, through network analyses, we capture markedly higher stability and antagonistic potentials in the nasal microbiome of females than that of males, in the shaping of which the sex-dependent evolutionary characteristics might have played a role as revealed by the keystone bacteria of the communities.

## Results

### *Characterizing the nasal bacteriome and mycobiome*

To characterize the nasal microbiome of healthy young adults, we performed deep shotgun metagenomic sequencing on 1,593 anterior nares samples from the 4D-SZ cohort (C. Chen et al., 2021; Jie et al., 2021a; 2021b; X. Liu et al., 2022; Zhu et al., 2021) (Table S1). In total, 128.21 terabases raw data were generated with an average of 80.48 gigabases for each sample (Table S2). A single sample assembly, and single sample binning strategy (see Methods) was employed to reconstruct genomes from the ultra-deeply sequenced metagenomic data. A total of 4,197 metagenome-assembled genomes (MAGs) were assembled at a threshold for quality control of >50% completeness and ≤10% contamination. To compile a non-redundant MAGs catalog, we performed de-replication with 99% of the average nucleotide identity (ANI). At the end, a catalog of 974 non-redundant MAGs for human nasal associated bacteria were retained, which included 718 high-quality (completeness > 90% & contamination < 5%) and 256 medium quality (completeness > 50% & contamination < 10%) ones (Figure 1a; Figure S1). 16S rRNA genes had been detected in about 45% of the 974 MAGs (Figure 1a). To explore the taxonomic coverage of this catalog, we classified the MAGs according to 95% average nucleotide identity. Overall, we obtained 232 species from 13 known phyla, with 150 annotated to known genomes in the GTDB database, and the other 82 as newly identified (unknown) (Figure. 1b). The unknown species spanned over all of the 13 phyla, with the largest number from Bacteroidota. For four phyla, including Fusobacteriota,

Eremiobacterota, Deinococcota and Bdellovibrionota, only unknown species were discovered. This suggests that the habitat of the nasal cavity featured drastically distinct characteristics from other habitats where the species of these phyla are often identified, e.g. *Fusobacterium nucleatum* of phylum Fusobacteriota is often detected in oral and fecal samples. Additionally, we identified six novel genera from phylum Proteobacteria, Bacteroidota and Firmicutes\_A, and one novel family from phylum Eremiobacterota, which cannot be assigned to any known taxa of the respective level at the level-specific phylogenetic distance cut-offs (Table S3). Notably, our data also improved the genome completeness of a singleton taxon, namely *QFNR01 sp003248485* (90.42% completeness, compared with 75.15% completeness in GTDB; Table S3). Overall, the majority of the MAGs in the catalog belonged to Actinobacteriota, Proteobacteria and Firmicutes, which is typical for the human nasal microbiome (Clark, 2020; Dimitri-Pinheiro et al., 2020; Human Microbiome Project Consortium, 2012).

Natural products of human microbiota are increasingly recognized as important mediators for a variety of microbe-host and microbe-microbe interactions, which in turn can be explored for potential pharmaceutical applications (Donia and Fischbach, 2015; Milshteyn et al., 2018; Sugimoto et al., 2019). As an example, a nasal isolate of *Staphylococcus lugdunensis* has recently been shown to produce a novel antibiotic, lugdunin, a non-ribosomally synthesized bioactive natural product, which is bactericidal against major human pathogens and prohibits the colonization of *S. aureus* in the nasal cavity (Zipperer et al., 2016). We therefore screened for the presence of secondary metabolites biosynthetic gene clusters (BGCs) encoded within the 974 non-redundant MAGs using antiSMASH (Blin et al., 2013; 2018; Medema et al., 2011) (Table S3b). In total, we detected 2,921 BGCs, which were primarily inferred as synthesized terpenes, nonribosomal peptides (NRPs), types I polyketide synthases (PKSs), siderophores and other unspecified ribosomally synthesised and post-translationally modified peptide products (RiPPs). Notably, 514 of them were screened from MAGs newly identified from the nasal microbiome in this cohort (Figure S2b). In addition, 1,975 (67.2%) of the detected gene clusters were novel clusters, most of which were from Actinobacteriota, Firmicutes-and Proteobacteria (Figure S2c). These data, in particular the high number and proportion of novel clusters, suggests that the nasal microbiota may serve as a rich reservoir for new antibiotics or other pharmaceuticals.

To profile the nasal microbiome composition, the metagenome data were first mapped to the constructed non-redundant nasal MAGs catalog and generated the bacterial profile for each sample. The most abundant species were mainly from genera *Corynebacterium*,



*Staphylococcus*, *Moraxella*, *Cutibacterium*, *Dolosigranulum*, and *Lawsonella*. Accumulative abundance analysis showed that top-ranked 17 species accounted for over 90% of the overall composition, suggesting that the nasal bacterial community was dominated by a few taxa (Figure S3). To characterize the mycobiome composition, we aligned our high-quality cleaned metagenome data to a manually curated database with Kraken. In total, we identified 607 fungal species in this cohort with the most from phyla Ascomycota and Basidiomycota (Figure 1c). While the bacterial community was dominated by several species, the mycobiome was more evenly distributed, taking over 50 species to account for ~90% of the overall fungal mycobiome composition. *Aspergillus spp.* and *Malasseziaceae spp.*, among others, are the most abundant fungi in the nasal cavity of this cohort (Figure S3).

### ***Unsupervised clustering helps uncover sex differences in the nasal microbiome composition***

To gain a holistic perspective of the microbial structure, we integrated the bacterial and fungal community profile with a weighted similarity network fusion approach. Unsupervised clustering of the resultant similarity matrix classified the cohort into three clusters (Figure 2a; see Methods). Permutational multivariate analysis of variance (PERMANOVA) on bray dissimilarity showed that these clusters explained over 18% of the variance in the composition between any two or among all three clusters (Figure 2b). In particular clusters 2 and 3 contained samples almost exclusively from single sex, i.e. male and female, respectively. Even in cluster 1 the similarity matrix featured two separable patterns corresponding to two sexes, suggesting distinctive structures in the nasal microbiome composition between males and females.

Following this link that unsupervised clustering uncovered, we systematically evaluated the sex differences in the nasal microbiome composition. PERMANOVA confirmed that sex was a significant covariant for the nasal bacteriome, mycobiome as well as the bacteria-fungi integrated microbiome (Table S4). In the bacteria-fungi integrated profile we observed a significantly higher Shannon diversity in males than in females (Figure 2c; Table S5). However, this observation was mainly attributed to the mycobiome. No significant difference in the Shannon diversity of the bacteriome was detected. For individual microbial taxon, we performed linear discriminative analysis (LDA) and identified considerable significant associations between the relative abundances and sex. Specifically, at the species level 59 bacteria and 148 fungi, and at the genus level 24 bacteria and 23 fungi, were significantly different in abundance between males and

females (Figure 2d; Table S6). Interestingly, the taxa number enriched in females almost doubled that in males. Notably, *Staphylococcus aureus*, a commonly known opportunistic pathogen in the nasal cavity, was not only more prevalent but also significantly more enriched in females. Meanwhile, *Corynebacterium accolens*, *Corynebacterium pseudodiphtheriticum*, and *Dolosigranulum pigrum*, for which cooperative or competitive relationships with *S. aureus* have been identified in former studies via association and experimental validation (Brugger et al., 2020; De Boeck et al., 2021; Krismer et al., 2017; Yan et al., 2013), as the most abundant species among others in this cohort, were also significantly more abundant in females. Additionally, *Lactobacillus spp.*, typically found in the female vagina, has been recently reported to have a niche in the human nose and may exert a beneficial effect (De Boeck et al., 2020). In our cohort, *Lactobacillus spp.* were also detected, with females characterized by a higher relative abundance of *L. iners* and *L. crispatus* than males.

#### ***Network analyses capture markedly higher ecological stability and antagonistic potentials in the nasal microbiome of females than that of males***

Having uncovered extensive sex differences in the microbial composition, next we aimed to determine if the nasal microbiome featured different ecological relationship characteristics between males and females. To characterize the microbial interactions within each sex, we employed an integrated approach combining COAT (composition-adjusted thresholding), HUGE (High-dimensional Undirected Graph Estimation), MI (mutual information) and Bray-Curtis dissimilarity to construct the co-occurrence networks (Figure 3a; see Methods). The inferred interactions between microbes, as nodes in the graphs, were represented by signed edges in the network, with positive for cooperative/synergistic relation and negative for competitive/antagonistic relation. The total number of interactions (edges) was very close between the two sexes with a marginally higher number of negative interactions in females. Splitting the entire network into three sub-networks, i.e. within the bacteria domain, within the fungi domain and cross bacteria-fungi domain, revealed that the cross-domain sub-network accounted for over half of the negative interactions (Figure 3b; Table S7).

The functioning of complex networks largely relies on their robustness (Matchado et al., 2021), a better understanding of which can provide valuable insights into RTI susceptibility and pathologies. We thus adopted a sensitive and reliable measure, namely natural connectivity (Peng and J. Wu, 2016; J. Wu et al., 2010; X.-K. Zhang et al., 2013), to quantify the stability of the inferred networks. To simulate the influence of microbes'



loss on the network, we performed random attacks and assessed the stability of the remaining network (hamster et al., 2019) (see Methods). Intriguingly, the network robustness was much higher for females than for males. While the human nasal microbiome is increasingly regarded as a gatekeeper of respiratory health, opportunistic pathogens do often present even in healthy individuals. Thus, the negative/antagonistic interactions are of particular interest. When only considering the negative interactions, we observed that much higher robustness for females still held. Significant separations of the natural connectivity plot were observed between the networks of males and females, for both the entire network and the negative network (P-value < 2.2e-16; Figure 3c and 3d). Higher overall natural connectivity for females largely remained until over half of the species were removed, further confirming that females characterized a more stable network with more intensive interactions and higher antagonistic potentials which may provide stronger resistance against opportunistic pathogens. Additionally, comparison of the random attack results between the cross-domain network and within domain networks demonstrated that the fungal mycobiome made a great contribution to the network robustness. Interestingly, a recent study also suggested that fungi played a stabilizing role in the lung and skin microbial ecosystems (Tipton et al., 2018).

### ***Sex-dependent genetic evolutionary forces in the shaping of keystones in the nasal microbial community***

Network analysis can be a powerful tool for inferring keystone taxa of the microbial communities (Banerjee et al., 2018; Layeghifard et al., 2016; Matchado et al., 2021; Zamkovaya et al., 2020). To this end, we adopted a novel influential node detection method, integrated value of influence (IVI), which captures all topological dimensions of the networks, to assess the importance of individual taxon of the community (Salavaty et al., 2020). Notably, the IVIs of most taxa derived from the entire networks of males and females were considerably different (Table S8), indicating different levels of importance of the respective taxa potentially eliciting in the microbial community of each sex. Moreover, IVI only weakly correlated with relative abundance (Figure S4), suggesting that the most abundant taxa may not necessarily exert the strongest influences in the community (Banerjee et al., 2018; Zamkovaya et al., 2020). Keystone microbes represent the ones contributing the most to the robustness of the community. With a permutational approach (see Methods) we derived the keystone sets for males and females, which included 13 and 10 taxa respectively (Figure 4a). Intriguingly, the keystone sets for males and females both contained taxa from bacterial and fungal domains, but with completely

1 different specific components and remarkably different IVIs between the two sexes for  
2 each keystone.

3 Evolution is important for ecological dynamics in bacterial communities. To illuminate  
4 the genetic evolutionary characteristics of the keystones for each sex, we evaluated the  
5 selection of environmental pressures for the keystone bacteria by estimating the pN/pS  
6 ratio within each genome for each sample (Garud and Pollard, 2022; Schloissnig et al.,  
7 2013). The results showed that the pN/pS ratios varied among different species, but were  
8 mostly below one for both males and females (Figure 4b). This suggested that the  
9 evolution of the keystone bacteria was largely predominated by long-term purifying  
10 selection. On the other hand, the pN/pS ratios differed significantly between males and  
11 females in some of the keystone bacteria, including male-specific keystone  
12 *Staphylococcus warneri* and female-specific keystone *Anaerococcus provencensis*,  
13 *Stenotrophomonas geniculata*, and *Finegoldia s1* (Figure 4b). This can potentially be in  
14 relation to sex-specific evolutionary constraints confronted by the microbes in the nasal  
15 cavity of males and females, such as different levels of immunoinflammatory  
16 characteristics.

17 On the gene level, however, we observed considerable deviations in pN/pS ratios of the  
18 same keystone taxa between males and females, indicating sex-dependent selective  
19 pressures and genetic adaptations (Figure 4c, Figure S5; Table S9). For instance, the  
20 nasal cavity is noted for limited resources available, such as iron limitation (Krismer et al.,  
21 2014; Kumpitsch et al., 2019; Stubbendieck et al., 2019). Notably, the 974 nasal bacterial  
22 MAGs encoded remarkably more siderophores (Figure S2b), one of the main  
23 mechanisms for bacterial iron sequestering, compared to that detected in the large  
24 collection of human gut bacterial MAGs derived from over 10,000 samples (Almeida et  
25 al., 2019). Although *Neisseria sicca*, a common nasopharyngeal commensal, does not  
26 encode siderophores (Marri et al., 2010), we found the female keystone *N. sicca\_D*  
27 underwent positive adaptation in genes encoding TonB-dependant siderophore receptors  
28 (mean pN/pS ratio of 1.168) in females, with which the bacteria can exploit siderophores  
29 produced by other members of the community for iron sequestering. In contrast, in males  
30 it was subjected to purifying selection in these genes with a mean pN/pS ratio of 0.195. In

a male keystone bacterium, *Staphylococcus haemolyticus*, we also observed that genes encoding IucA/IucC family siderophore biosynthesis protein showed relaxed purifying selection in males (mean pN/pS ratio of 0.496) but tight purified selection in females (mean pN/pS ratio of 0.116). Gene *yfmC* in *S. haemolyticus*, which encodes Fe<sup>(3+)</sup>-citrate-binding protein involved in iron transport, was purged in males (mean pN/pS ratio of 0) whereas showed tight purified selection (mean pN/pS ratio of 0.259) in females. Antibiotics represent another major category of stresses for bacteria, for which resistance evolves over time. As a global emerging multidrug-resistant organism, *Stenotrophomonas maltophilia* has been most commonly associated with respiratory infections in humans (Brooke, 2012) and isolated predominantly in elderly males of hospitalized lower RTI patients (Chawla et al., 2014). Like the other MacA-MacB-TolC tripartite efflux pumps, *S. maltophilia* MacB has been previously revealed to drive resistance to a variety of antibiotics, such as macrolides, aminoglycosides and polymyxins, in concert with MacA adaptor protein and TolC outer membrane exit duct (Crow et al., 2017; Koronakis, 2018; Lin et al., 2014). Interestingly, we found in *S. maltophilia* *L* the gene coding for MacB exhibited strong positive selection in males, but tight negative selection in females (mean pN/pS ratio: 2.73 vs. 0.08). Together, the keystone bacteria exhibited highly sex-specific genetic evolutionary characteristics in niche-specific or sex-biased stress-related functional units, which was in close relation to their role in the respective network of each sex. This suggests that the genetic evolutionary forces might have played a role in the shaping of the keystones of the nasal microbial community of each sex. The effect might even be mutual, such that interactions of the keystones spurred evolution which in turn reinforced their role as keystone, or the other way around.

## Discussion

With advances in sequencing technologies, microbial research is no more restricted to cultivation. Great efforts have since been made to characterize the human microbiome. However, most of the studies rely on 16S rDNA amplicon-based or gene-centric microbial community characterization, which is heavily skewed by microbes that are easily cultivatable or the most researched habitats' residents, such as the human gut

microbiome (Bolyen et al., 2019; Callahan et al., 2016; MetaHIT Consortium et al., 2014; Segata et al., 2012; Woyke, 2019; Xie et al., 2016). Recently, genome-resolved metagenomics through de novo assembly has transformed our understanding of the microbiome composition, which can meanwhile provide valuable knowledge of individual species for deciphering their biological roles. The human microbiome has a strong niche specialization both within and among individuals (Human Microbiome Project Consortium, 2012). Large reference genome catalogs have been constructed for the human gut and oral microbiome, and massively expanded the known species repertoire of the respective habitats (Almeida et al., 2019; 2021; Nayfach et al., 2019; Pasolli et al., 2019; Zhu et al., 2021). Here in this work, we leveraged ultra-deeply sequenced metagenome data from a large cohort of healthy young adults and constructed a non-redundant nasal associated bacterial MAGs catalog. It represents the first endeavor in cataloging the human nasal microbial reference genome, and makes a great contribution to the global effort for characterizing the human microbiome. The catalog provides a valuable resource for profiling the nasal microbiome and developing new antibiotics or other pharmaceuticals in future studies. Meanwhile, it makes it possible for uncovering potentially important unknown taxa in this ecosystem.

Respiratory health is of vital importance for human beings. The COVID-19 pandemic has made it unprecedentedly clear. Sex biases have been widely noted in different types of respiratory diseases, COVID-19 included as well. Heightened immunity in females renders them generally less affected by infections, but more prone to autoimmunity diseases (Jacobsen and Klein, 2021; Scully et al., 2020; Vahidy et al., 2021). Sex hormones and chromosomes can also play important roles. However the underlying mechanisms remain unclear. Recently it has been argued that the nasal microbiome might also play a role in the observed disparities between males and females, but unfortunately lacked support and evidence (Shah, 2021). In this work, unsupervised clustering of the nasal microbiota revealed clearly separable patterns between males and females. This led us to further systematically evaluate the sex differences in this community and uncovered extensive sex-specific features. Females harbored higher abundances of more taxa, including the commonly known respiratory tract opportunistic pathogen, *Staphylococcus aureus*, and several species formerly identified associating with it. Intriguingly, the interaction networks of females also featured higher robustness and stronger antagonistic interaction potentials than males. The connection of such characteristics with lower susceptibility and severity of RTIs in females compared to males warrants further investigation. While bacterial interaction networks are widely studied and cross-domain

interactions are rarely explored, our work integrated the bacteriome and mycobiome and gained a more holistic perspective of the community. Our results suggested that the mycobiome might play an important stabilizing role, in an echo of a former study (Tipton et al., 2018). Through network analysis, we identified sex-specific keystone microbes, which also included formerly unknown taxa, demonstrating the power and necessity of cataloging the community through de novo assembly. The sex-dependent evolutionary characteristics of the keystone bacteria strongly correlated with their role played in the microbial community of each sex, i.e. as a keystone for one sex but not for the other, suggesting a role of the evolutionary forces in the shaping of the keystones, which may have further contributed to the formation of the communities. For instance, the nasopharyngeal commensal *N. sicca*\_D, acts as the most influential keystone in females while undergoing positive genetic adaptation in response to niche-specific stress condition as of iron limitation, which might have contributed to the formation of the more stable nasal microbial communities against infections. On the other hand, *S. maltophilia*\_L, a male-prone respiratory infection associated multidrug-resistant organism, acts as the most influential keystone in males and exhibited strong positive selection for antibiotic resistance relevant efflux pumps, which may further predispose males more vulnerable to infections.

In conclusion, we leveraged in this work the most advanced techniques in the microbiome research field, and applied deep shotgun whole metagenome sequencing, de novo assembly, and network analyses to explore the understudied human nasal microbiome in the largest cohort as of today. Based on that, we constructed a non-redundant nasal bacterial MAGs catalog, and revealed extensive sex differences in the nasal microbiome of healthy young adults. The results provide valuable insights into the observed discrepancies between males and females in respiratory tract diseases, and will help further our understanding of the microbial roles in pathology and etiology. Nevertheless, the findings are limited to mathematical modeling and inference, and experimental validation is desired in the future. Besides, interactions between viruses and bacteria widely exist, such as the synergism between influenza virus and *S. pneumoniae* (Bosch et al., 2013; Korten et al., 2019; McCullers, 2006). Though females are less contracted with most types of RTIs, they are indeed more vulnerable to certain respiratory viral pathogens, such as influenza (Klein et al., 2012). While we are in short of reliably profiled virome data, antagonistic potentials against influenza as well as other specific pathogens require further investigation.

## 1 **Author contributions**

2 R.G., T.Z., and H.J. conceived and directed the project. J.W. initiated the overall health  
3 project. H.Y., X.X., X.J., Y.C., P.L., Y.H. and L.X. contributed to the organization of the  
4 cohort, the sample collection, and questionnaire collection. W.L., X.T. and Z.J. helped  
5 checking the phenotypes. H.L. led the DNA extraction and sequencing. R.G. led the  
6 bioinformatic analyses. Y.J., M.L., S.L., and Z.S. performed the bioinformatic analyses,  
7 and prepared figures and texts for manuscript. Z.Z. and R.G. interpreted the results. Z.Z.,  
8 R.G. and Y.J. wrote the manuscript. Q.S. contributed to the revision of the manuscript.  
9 All authors read and approved the final manuscript.

## 10 **Acknowledgments**

11 We sincerely thank the support provided by the China National Gene Bank. We thank all  
12 the volunteers for their time and contribution. The data that support the findings of this  
13 study have been deposited into CNGB Sequence Archive (CNSA)(Guo et al., 2020) of  
14 China National GeneBank DataBase (CNGBdb)(F. Z. Chen et al., 2020) with accession  
15 number CNP0002487.

## 17 **Data and code availability**

18 Metagenomic data have been deposited into the Genome Sequence Archive (GSA) with  
19 accession number CRA006819 and CNSA of CNGBdb with accession number  
20 CNP0002487.

21

22



# References

- Almeida, A., Mitchell, A.L., Boland, M., Forster, S.C., Gloor, G.B., Tarkowska, A., Lawley, T.D., Finn, R.D., 2019. A new genomic blueprint of the human gut microbiota. *Nature* 568, 499–504. doi:10.1038/s41586-019-0965-1
- Almeida, A., Nayfach, S., Boland, M., Strozzi, F., Beracochea, M., Shi, Z.J., Pollard, K.S., Sakharova, E., Parks, D.H., Hugenholtz, P., Segata, N., Kyrpides, N.C., Finn, R.D., 2021. A unified catalog of 204,938 reference genomes from the human gut microbiome. *Nat. Biotechnol.* 39, 105–114. doi:10.1038/s41587-020-0603-3
- Alneberg, J., Bjarnason, B.S., de Bruijn, I., Schirmer, M., Quick, J., Ijaz, U.Z., Lahti, L., Loman, N.J., Andersson, A.F., Quince, C., 2014. Binning metagenomic contigs by coverage and composition. *Nature Methods* 11, 1144–1146. doi:10.1038/nmeth.3103
- Banerjee, S., Schlaeppli, K., van der Heijden, M.G.A., 2018. Keystone taxa as drivers of microbiome structure and functioning. *Nature Reviews Microbiology* 16, 567–576. doi:10.1038/s41579-018-0024-1
- Blin, K., Medema, M.H., Kazempour, D., Fischbach, M.A., Breitling, R., Takano, E., Weber, T., 2013. antiSMASH 2.0—a versatile platform for genome mining of secondary metabolite producers. *Nucleic Acids Research* 41, W204–W212. doi:10.1093/nar/gkq365
- Blin, K., Pascal Andreu, V., de los Santos, E.L.C., Del Carratore, F., Lee, S.Y., Medema, M.H., Weber, T., 2018. The antiSMASH database version 2: a comprehensive resource on secondary metabolite biosynthetic gene clusters. *Nucleic Acids Research* 47, D625–D630. doi:10.1093/nar/gkw290
- Blin, K., Shaw, S., Kloosterman, A.M., Charlop-Powers, Z., van Wezel, G.P., Medema, M.H., Weber, T., 2021. antiSMASH 6.0: improving cluster detection and comparison capabilities 1–7. doi:10.1093/nar/gkab335
- Bolyen, E., Rideout, J.R., Dillon, M.R., Bokulich, N.A., Abnet, C.C., Al-Ghalith, G.A., Alexander, H., Alm, E.J., Arumugam, M., Asnicar, F., Bai, Y., Bisanz, J.E., Bittinger, K., Brejnrod, A., Brislawn, C.J., Brown, C.T., Callahan, B.J., Caraballo-Rodríguez, A.M., Chase, J., Cope, E.K., Da Silva, R., Diener, C., Dorrestein, P.C., Douglas, G.M., Durall, D.M., Duvallet, C., Edwardson, C.F., Ernst, M., Estaki, M., Fouquier, J., Gauglitz, J.M., Gibbons, S.M., Gibson, D.L., Gonzalez, A., Gorlick, K., Guo, J., Hillmann, B., Holmes, S., Holste, H., Huttenhower, C., Huttley, G.A., Janssen, S., Jarmusch, A.K., Jiang, L., Kaehler, B.D., Kang, K.B., Keefe, C.R., Keim, P., Kelley, S.T., Knights, D., Koester, I., Kosciulek, T., Kreps, J., Langille, M.G.I., Lee, J., Ley, R., Liu, Y.-X., Loftfield, E., Lozupone, C., Maher, M., Marotz, C., Martin, B.D., McDonald, D., McIver, L.J., Melnik, A.V., Metcalf, J.L., Morgan, S.C., Morton, J.T., Naimey, A.T., Navas-Molina, J.A., Nothias, L.F., Orchanian, S.B., Pearson, T., Peoples, S.L., Petras, D., Preuss, M.L., Pruesse, E., Rasmussen, L.B., Rivers, A., Robeson, M.S., Rosenthal, P., Segata, N., Shaffer, M., Shiffer, A., Sinha, R., Song, S.J., Spear, J.R., Swafford, A.D., Thompson, L.R., Torres, P.J., Trinh, P., Tripathi, A., Turnbaugh, P.J., Ul-Hasan, S., van der Hooft, J.J.J., Vargas, F., Vázquez-Baeza, Y., Vogtmann, E., Hoppel, von, M., Walters, W., Wan, Y., Wang, M., Warren, J., Weber, K.C., Williamson, C.H.D., Willis, A.D., Xu, Z.Z., Zaneveld, J.R., Zhang, Y., Zhu, Q., Knight, R., Caporaso, J.G., 2019. Reproducible, interactive, scalable and extensible microbiome data science using QIIME 2. *Nat. Biotechnol.* 37, 852–857. doi:10.1038/s41587-019-0209-9

- 1 Bosch, A.A.T.M., Biesbroek, G., Trzcinski, K., Sanders, E.A.M., Bogaert, D., 2013.
- 2 Viral and bacterial interactions in the upper respiratory tract. *PLoS Pathog* 9,
- 3 e1003057. doi:10.1371/journal.ppat.1003057
- 4 Brooke, J.S., 2012. *Stenotrophomonas maltophilia*: an emerging global opportunistic
- 5 pathogen. *Clin Microbiol Rev* 25, 2–41. doi:10.1128/CMR.00019-11
- 6 Brugger, S.D., Eslami, S.M., Pettigrew, M.M., Escapa, I.F., Henke, M.T., Kong, Y.,
- 7 Lemon, K.P., 2020. *Dolosigranulum pigrum* Cooperation and Competition in Human
- 8 Nasal Microbiota. *mSphere* 5. doi:10.1128/msphere.00852-20
- 9 Callahan, B.J., McMurdie, P.J., Rosen, M.J., Han, A.W., Johnson, A.J.A., Holmes, S.P.,
- 10 2016. DADA2: High-resolution sample inference from Illumina amplicon data.
- 11 *Nature Methods* 13, 581–583. doi:10.1038/nmeth.3869
- 12 Cantalapiedra, C.P., Hernández-Plaza, A., Letunic, I., Bork, P., Huerta-Cepas, J., 2021.
- 13 eggNOG-mapper v2: Functional Annotation, Orthology Assignments, and Domain
- 14 Prediction at the Metagenomic Scale. *Mol Biol Evol* 38, 5825–5829.
- 15 doi:10.1093/molbev/msab293
- 16 Cao, Y., Lin, W., Li, H., 2018. Large Covariance Estimation for Compositional Data via
- 17 Composition-Adjusted Thresholding. *Journal of the American Statistical Association*
- 18 114, 759–772. doi:10.1080/01621459.2018.1442340
- 19 Chan, P.P., Lowe, T.M., 2019. tRNAscan-SE: Searching for tRNA Genes in Genomic
- 20 Sequences. *Methods Mol Biol* 1962, 1–14. doi:10.1007/978-1-4939-9173-0\_1
- 21 Chaumeil, P.-A., Mussig, A.J., Hugenholtz, P., Parks, D.H., 2019. GTDB-Tk: a toolkit to
- 22 classify genomes with the Genome Taxonomy Database. *Bioinformatics*.
- 23 doi:10.1093/bioinformatics/btz848
- 24 Chawla, K., Vishwanath, S., Gupta, A., 2014. *Stenotrophomonas maltophilia* in Lower
- 25 Respiratory Tract Infections. *J Clin Diagn Res* 8, DC20–2.
- 26 doi:10.7860/JCDR/2014/10780.5320
- 27 Chen, C., Hao, L., Zhang, Z., Tian, L., Zhang, X., Zhu, J., Jie, Z., Tong, X., Xiao, L.,
- 28 Zhang, T., Jin, X., Xu, X., Yang, H., Wang, J., Kristiansen, K., Jia, H., 2021.
- 29 Cervicovaginal microbiome dynamics after taking oral probiotics. *J Genet Genomics*
- 30 48, 716–726. doi:10.1016/j.jgg.2021.03.019
- 31 Chen, F.Z., You, L.J., Yang, F., Wang, L.N., Guo, X.Q., Gao, F., Hua, C., Tan, C., Fang,
- 32 L., Shan, R.Q., Zeng, W.J., Wang, B., Wang, R., Xu, X., Wei, X.F., 2020. CNGBdb:
- 33 China National GeneBank DataBase. *Yi Chuan* 42, 799–809. doi:10.16288/j.ycz.20-
- 34 080
- 35 Chen, S., Zhou, Y., Chen, Y., Gu, J., 2018. fastp: an ultra-fast all-in-one FASTQ
- 36 preprocessor. *Bioinformatics* 34, i884–i890. doi:10.1093/bioinformatics/bty560
- 37 Clark, S.E., 2020. Commensal bacteria in the upper respiratory tract regulate
- 38 susceptibility to infection. *Current Opinion in Immunology* 66, 42–49.
- 39 doi:10.1016/j.coi.2020.03.010
- 40 Crow, A., Greene, N.P., Kaplan, E., Koronakis, V., 2017. Structure and
- 41 mechanotransmission mechanism of the MacB ABC transporter superfamily. *Proc.*
- 42 *Natl. Acad. Sci. U.S.A.* 114, 12572–12577. doi:10.1073/pnas.1712153114
- 43 Dai, Wenfang, Chen, J., Xiong, J., 2018. Concept of microbial gatekeepers: Positive guys?
- 44 1–9. doi:10.1007/s00253-018-9522-3
- 45 Dai, Wenkui, Wang, H., Zhou, Q., Li, D., Feng, X., Yang, Z., Wang, W., Qiu, C., Lu, Z.,
- 46 Xu, X., Lyu, M., Xie, G., Li, Y., Bao, Y., Liu, Y., Shen, K., Yao, K., Feng, X., Yang,

- 1 Y., Zhou, K., Li, S., Zheng, Y., 2019. An integrated respiratory microbial gene  
2 catalogue to better understand the microbial aetiology of *Mycoplasma pneumoniae*  
3 pneumonia. *Gigascience* 8. doi:10.1093/gigascience/giz093
- 4 De Boeck, I., van den Broek, M.F.L., Allonsius, C.N., Spacova, I., Wittouck, S., Martens,  
5 K., Wuyts, S., Cauwenberghs, E., Jokicevic, K., Vandenheuvel, D., Eilers, T.,  
6 Lemarcq, M., De Rudder, C., Thys, S., Timmermans, J.-P., Vroegop, A.V.,  
7 Verplaetse, A., Van de Wiele, T., Kiekens, F., Hellings, P.W., Vanderveken, O.M.,  
8 Lebeer, S., 2020. Lactobacilli Have a Niche in the Human Nose. *CellReports* 31,  
9 107674. doi:10.1016/j.celrep.2020.107674
- 10 De Boeck, I., Wittouck, S., Martens, K., Spacova, I., Cauwenberghs, E., Allonsius, C.N.,  
11 Jörissen, J., Wuyts, S., Van Beeck, W., Dillen, J., Bron, P.A., steelant, B., Hellings,  
12 P.W., Vanderveken, O.M., Lebeer, S., 2021. The nasal mutualist *Dolosigranulum*  
13 *pigrum* AMBR11 supports homeostasis via multiple mechanisms. *ISCIENCE* 24,  
14 102978. doi:10.1016/j.isci.2021.102978
- 15 de Steenhuijsen Piters, W.A.A., Binkowska, J., Bogaert, D., 2020. Early Life  
16 Microbiota and Respiratory Tract Infections. *Cell Host Microbe* 28, 223–232.  
17 doi:10.1016/j.chom.2020.07.004
- 18 Dimitri-Pinheiro, S., Soares, R., Barata, P., 2020. The Microbiome of the Nose—Friend  
19 or Foe? *Allergy & Rhinology* 11, 215265672091160.  
20 doi:10.1177/2152656720911605
- 21 Donia, M.S., Cimermanic, P., Schulze, C.J., Brown, L.C.W., Martin, J., Mitreva, M.,  
22 Clardy, J., Linington, R.G., Fischbach, M.A., 2014. A Systematic Analysis of  
23 Biosynthetic Gene Clusters in the Human Microbiome Reveals a Common Family of  
24 Antibiotics. *Cell* 158, 1402–1414. doi:10.1016/j.cell.2014.08.032
- 25 Donia, M.S., Fischbach, M.A., 2015. Small molecules from the human microbiota.  
26 *Science* 349, 1254766–1254766. doi:10.1073/pnas.1120788109
- 27 Earl, J.P., Adappa, N.D., Krol, J., Bhat, A.S., Balashov, S., Ehrlich, R.L., Palmer, J.N.,  
28 Workman, A.D., Blasetti, M., Sen, B., Hammond, J., Cohen, N.A., Ehrlich, G.D.,  
29 Mell, J.C., 2018. Species-level bacterial community profiling of the healthy sinonasal  
30 microbiome using Pacific Biosciences sequencing of full-length 16S rRNA genes.  
31 *Microbiome* 6, 190. doi:10.1186/s40168-018-0569-2
- 32 Falagas, M.E., Mourtzoukou, E.G., Vardakas, K.Z., 2007. Sex differences in the  
33 incidence and severity of respiratory tract infections. *Respir Med* 101, 1845–1863.  
34 doi:10.1016/j.rmed.2007.04.011
- 35 Faust, K., Sathirapongsasuti, J.F., Izard, J., Segata, N., Gevers, D., Raes, J., Huttenhower,  
36 C., 2012. Microbial co-occurrence relationships in the human microbiome. *PLOS*  
37 *Computational Biology* 8, e1002606. doi:10.1371/journal.pcbi.1002606
- 38 Fazlollahi, M., Lee, T.D., Andrade, J., Oguntuyo, K., Chun, Y., Grishina, G., Grishin, A.,  
39 Bunyavanich, S., 2018. The nasal microbiome in asthma. *J Allergy Clin Immunol*  
40 142, 834–843.e2. doi:10.1016/j.jaci.2018.02.020
- 41 Ferkol, T., Schraufnagel, D., 2014. The global burden of respiratory disease. *Ann Am*  
42 *Thorac Soc* 11, 404–406. doi:10.1513/AnnalsATS.201311-405PS
- 43 Gan, W., Zhang, H., Yang, F., Liu, S., Liu, F., Meng, J., 2021. The influence of nasal  
44 microbiome diversity and inflammatory patterns on the prognosis of nasal polyps.  
45 *Scientific Reports* 11, 6364. doi:10.1038/s41598-021-85292-5
- 46 Garud, N.R., Pollard, K.S., 2022. Population Genetics in the Human Microbiome. *Trends*

in Genetics 1–15. doi:10.1016/j.tig.2019.10.010

GBD 2019 Diseases and Injuries Collaborators, 2020. Global burden of 369 diseases and injuries in 204 countries and territories, 1990–2019: a systematic analysis for the Global Burden of Disease Study 2019. *Lancet* 396, 1204–1222. doi:10.1016/S0140-6736(20)30925-9

Guo, X., Chen, F., Gao, F., Li, L., Liu, K., You, L., Hua, C., Yang, F., Liu, W., Peng, C., Wang, L., Yang, X., Zhou, F., Tong, J., Cai, J., Li, Z., Wan, B., Zhang, L., Yang, T., Zhang, M., Yang, L., Yang, Y., Zeng, W., Wang, B., Wei, X., Xu, X., 2020. CNSA: a data repository for archiving omics data. Database (Oxford) 2020. doi:10.1093/database/baaa055

hamster, Otsuka, M., Tsugawa, S., 2019. Robustness of network attack strategies against node sampling and link errors. *PLoS ONE* 14, e0221885. doi:10.1371/journal.pone.0221885

Han, M., Hao, L., Lin, Y., Li, F., Wang, J., Yang, H., Xiao, L., Kristiansen, K., Jia, H., Li, J., 2018. A novel affordable reagent for room temperature storage and transport of fecal samples for metagenomic analyses. *Microbiome* 6, 1–7. doi:10.1186/s40168-018-0429-0

Huerta-Cepas, J., Szklarczyk, D., Heller, D., Hernández-Plaza, A., Forslund, S.K., Cook, H., Mende, D.R., Letunic, I., Rattei, T., Jensen, L.J., Mering, von, C., Bork, P., 2019. eggNOG 5.0: a hierarchical, functionally and phylogenetically annotated orthology resource based on 5090 organisms and 2502 viruses. *Nucleic Acids Research* 47, D309–D314. doi:10.1093/nar/gky1085

Human Microbiome Project Consortium, 2012. Structure, function and diversity of the healthy human microbiome. *Nature* 486, 207–214. doi:10.1038/nature11234

Iwase, T., Uehara, Y., Shinji, H., Tajima, A., Seo, H., Takada, K., Agata, T., Mizunoe, Y., 2010. *Staphylococcus epidermidis* Esp inhibits *Staphylococcus aureus* biofilm formation and nasal colonization. *Nature* 465, 346–349. doi:10.1038/nature09074

Jacobsen, H., Klein, S.L., 2021. Sex Differences in Immunity to Viral Infections. *Front. Immunol.* 12, 720952. doi:10.3389/fimmu.2021.720952

Janek, D., Zipperer, A., Kulik, A., Krismer, B., Peschel, A., 2016. High Frequency and Diversity of Antimicrobial Activities Produced by Nasal *Staphylococcus* Strains against Bacterial Competitors. *PLoS Pathog* 12, e1005812. doi:10.1371/journal.ppat.1005812

Jie, Z., Chen, C., Hao, L., Li, F., Song, L., Zhang, X., Zhu, J., Tian, L., Tong, X., Cai, K., Zhang, Z., Ju, Y., Yu, X., Li, Y., Zhou, H., Lu, H., Qiu, X., Li, Q., Liao, Y., Zhou, D., Lian, H., Zuo, Y., Chen, X., Rao, W., Ren, Y., Wang, Y., Zi, J., Wang, R., Liu, N., Wu, J., Zhang, W., Liu, X., Zong, Y., Liu, W., Xiao, L., Hou, Y., Xu, X., Yang, H., Wang, J., Kristiansen, K., Jia, H., 2021a. Life History Recorded in the Vagino-cervical Microbiome Along with Multi-omics. *Genomics, Proteomics & Bioinformatics*. doi:10.1016/j.gpb.2021.01.005

Jie, Z., Liang, S., Ding, Q., Li, F., Tang, S., Wang, D., Lin, Y., Chen, P., Cai, K., Qiu, X., Li, Q., Liao, Y., Zhou, D., Lian, H., Zuo, Y., Chen, X., Rao, W., Ren, Y., Wang, Y., Zi, J., Wang, R., Zhou, H., Lu, H., Wang, X., Zhang, W., Zhang, T., Xiao, L., Zong, Y., Liu, W., Yang, H., Wang, J., Hou, Y., Liu, X., Kristiansen, K., Zhong, H., Jia, H., Xu, X., 2021b. A transomic cohort as a reference point for promoting a healthy human gut microbiome. *Medicine in Microecology* 8, 100039.

- 1       doi:10.1016/j.medmic.2021.100039
- 2       Jin, X., Ren, J., Li, R., Gao, Y., Zhang, H., Li, J., Zhang, J., Wang, X., Wang, G., 2021.
- 3       Global burden of upper respiratory infections in 204 countries and territories, from
- 4       1990 to 2019. *EClinicalMedicine* 37, 100986. doi:10.1016/j.eclinm.2021.100986
- 5       Jung, W.H., Croll, D., Cho, J.H., Kim, Y.R., Lee, Y.W., 2015. Analysis of the nasal
- 6       vestibule mycobiome in patients with allergic rhinitis. *Mycoses* 58, 167–172.
- 7       doi:10.1111/myc.12296
- 8       Kang, D.D., Li, F., Kirton, E., Thomas, A., Egan, R., An, H., Wang, Z., 2019. MetaBAT
- 9       2: an adaptive binning algorithm for robust and efficient genome reconstruction from
- 10      metagenome assemblies. *PeerJ* 7, e7359. doi:10.7717/peerj.7359
- 11      Kaul, D., Rathnasinghe, R., Ferres, M., Tan, G.S., Barrera, A., Pickett, B.E., Methe, B.A.,
- 12      Das, S.R., Budnik, I., Halpin, R.A., Wentworth, D., Schmolke, M., Mena, I.,
- 13      Albrecht, R.A., Singh, I., Nelson, K.E., García-Sastre, A., Dupont, C.L., Medina,
- 14      R.A., 2020. Microbiome disturbance and resilience dynamics of the upper respiratory
- 15      tract during influenza A virus infection. *Nat Commun* 11, 2537. doi:10.1038/s41467-
- 16      020-16429-9
- 17      Klein, S.L., Dhakal, S., Ursin, R.L., Deshpande, S., Sandberg, K., Mauvais-Jarvis, F.,
- 18      2020. Biological sex impacts COVID-19 outcomes. *PLoS Pathog* 16, e1008570.
- 19      doi:10.1371/journal.ppat.1008570
- 20      Klein, S.L., Hodgson, A., Robinson, D.P., 2012. Mechanisms of sex disparities in
- 21      influenza pathogenesis. *J Leukoc Biol* 92, 67–73. doi:10.1189/jlb.0811427
- 22      Koronakis, V., 2018. Antibiotic Resistance Mediated by the MacB ABC Transporter
- 23      Family: A Structural and Functional Perspective 1–17.
- 24      doi:10.3389/fmicb.2018.00950
- 25      Korten, I., Ramsey, K., Mika, M., Usemann, J., Frey, U., Hilty, M., Latzin, P., 2019.
- 26      Nasal Microbiota and Respiratory Tract Infections: The Role of Viral Detection.
- 27      *American Journal of Respiratory and Critical Care Medicine* 199, 919–922.
- 28      doi:10.1164/rccm.201710-2020le
- 29      Krismer, B., Liebeke, M., Janek, D., Nega, M., Rautenberg, M., Hornig, G., Unger, C.,
- 30      Weidenmaier, C., Lalk, M., Peschel, A., 2014. Nutrient limitation governs
- 31      *Staphylococcus aureus* metabolism and niche adaptation in the human nose. *PLoS*
- 32      *Pathog* 10, e1003862. doi:10.1371/journal.ppat.1003862
- 33      Krismer, B., Weidenmaier, C., Zipperer, A., Peschel, A., 2017. The commensal lifestyle
- 34      of *Staphylococcus aureus* and its interactions with the nasal microbiota. *Nature*
- 35      *Reviews Microbiology* 15, 675–687. doi:10.1038/nrmicro.2017.104
- 36      Kumpitsch, C., Koskinen, K., Schöpf, V., Moissl-Eichinger, C., 2019. The microbiome of
- 37      the upper respiratory tract in health and disease. *BMC Biol* 17, 87.
- 38      doi:10.1186/s12915-019-0703-z
- 39      la Cuesta-Zuluaga, de, J., Kelley, S.T., Chen, Y., Escobar, J.S., Mueller, N.T., Ley, R.E.,
- 40      McDonald, D., Huang, S., Swafford, A.D., Knight, R., Thackray, V.G., 2019. Age-
- 41      and Sex-Dependent Patterns of Gut Microbial Diversity in Human Adults. *mSystems*
- 42      4. doi:10.1128/mSystems.00261-19
- 43      Langmead, B., Salzberg, S.L., 2012. Fast gapped-read alignment with Bowtie 2. *Nature*
- 44      *Methods* 9, 357–359. doi:10.1038/nmeth.1923
- 45      Layeghifard, M., Hwang, D.M., Guttman, D.S., 2016. Disentangling Interactions in the
- 46      Microbiome: A Network Perspective. *Trends in Microbiology* 1–12.



- doi:10.1016/j.tim.2016.11.008
- Li, D., Liu, C.-M., Luo, R., Sadakane, K., Lam, T.-W., 2015. MEGAHIT: an ultra-fast single-node solution for large and complex metagenomics assembly via succinct de Bruijn graph. *Bioinformatics* 31, 1674–1676. doi:10.1093/bioinformatics/btv033
- Li, H., Durbin, R., 2009. Fast and accurate short read alignment with Burrows-Wheeler transform. *Bioinformatics* 25, 1754–1760. doi:10.1093/bioinformatics/btp324
- Li, Q., Zhao, X., Zhang, W., Wang, L., Wang, J., Xu, D., Mei, Z., Liu, Q., Du, S., Li, Z., Liang, X., Wang, X., Wei, H., Liu, P., Zou, J., Shen, H., Chen, A., Drmanac, S., Liu, J.S., Li, L., Jiang, H., Zhang, Y., Wang, J., Yang, H., Xu, X., Drmanac, R., Jiang, Y., 2019. Reliable multiplex sequencing with rare index mis-assignment on DNB-based NGS platform 1–13. doi:10.1186/s12864-019-5569-5
- Lin, Y.-T., Huang, Y.-W., Liou, R.-S., Chang, Y.-C., Yang, T.-C., 2014. MacABCsm, an ABC-type tripartite efflux pump of *Stenotrophomonas maltophilia* involved in drug resistance, oxidative and envelope stress tolerances and biofilm formation. *J. Antimicrob. Chemother.* 69, 3221–3226. doi:10.1093/jac/dku317
- Liu, C.M., Price, L.B., Hungate, B.A., Abraham, A.G., Larsen, L.A., Christensen, K., Stegger, M., Skov, R., Andersen, P.S., 2015. *Staphylococcus aureus* and the ecology of the nasal microbiome. *Sci. Adv.* 1, e1400216. doi:10.1126/sciadv.1400216
- Liu, X., Tong, X., Zou, Y., Lin, X., Zhao, H., Tian, L., Jie, Z., Wang, Q., Zhang, Z., Lu, H., Xiao, L., Qiu, X., Zi, J., Wang, R., Xu, X., Yang, H., Wang, J., Zong, Y., Liu, W., Hou, Y., Zhu, S., Jia, H., Zhang, T., 2022. Mendelian randomization analyses support causal relationships between blood metabolites and the gut microbiome. *Nature Genetics* 54, 52–61. doi:10.1038/s41588-021-00968-y
- Mac Aogáin, M., Narayana, J.K., Tiew, P.Y., Ali, N.A.B.M., Yong, V.F.L., Jaggi, T.K., Lim, A.Y.H., Keir, H.R., Dicker, A.J., Thng, K.X., Tsang, A., Ivan, F.X., Poh, M.E., Oriano, M., Aliberti, S., Blasi, F., Low, T.B., Ong, T.H., Oliver, B., Giam, Y.H., Tee, A., Koh, M.S., Abisheganaden, J.A., Tsaneva-Atanasova, K., Chalmers, J.D., Chotirmall, S.H., 2021. Integrative microbiomics in bronchiectasis exacerbations. *Nat. Med.* 27, 688–699. doi:10.1038/s41591-021-01289-7
- Mahdavinia, M., Keshavarzian, A., Tobin, M.C., Landay, A.L., Schleimer, R.P., 2016. A comprehensive review of the nasal microbiome in chronic rhinosinusitis (CRS). *Clin Exp Allergy* 46, 21–41. doi:10.1111/cea.12666
- Man, W.H., de Steenhuijsen Piter, W.A.A., Bogaert, D., 2017. The microbiota of the respiratory tract: gatekeeper to respiratory health. *Nature Reviews Microbiology* 15, 259–270. doi:10.1038/nrmicro.2017.14
- Marri, P.R., Paniscus, M., Weyand, N.J., Rendón, M.A., Calton, C.M., Hernández, D.R., Higashi, D.L., Sodergren, E., Weinstock, G.M., Rounsley, S.D., So, M., 2010. Genome sequencing reveals widespread virulence gene exchange among human *Neisseria* species. *PLoS ONE* 5, e11835. doi:10.1371/journal.pone.0011835
- Matchado, M.S., Lauber, M., Reitmeier, S., Kacprowski, T., Baumbach, J., Haller, D., List, M., 2021. Network analysis methods for studying microbial communities: A mini review. *Computational and Structural Biotechnology Journal* 19, 2687–2698. doi:10.1016/j.csbj.2021.05.001
- McCullers, J.A., 2006. Insights into the interaction between influenza virus and pneumococcus. *Clin Microbiol Rev* 19, 571–582. doi:10.1128/CMR.00058-05
- Medema, M.H., Blin, K., Cimermanic, P., de Jager, V., Zakrzewski, P., Fischbach, M.A.,



- 1 Weber, T., Takano, E., Breitling, R., 2011. antiSMASH: rapid identification,  
2 annotation and analysis of secondary metabolite biosynthesis gene clusters in  
3 bacterial and fungal genome sequences. *Nucleic Acids Research* 39, W339–W346.  
4 doi:10.1038/nrmicro2478
- 5 MetaHIT Consortium, Li, J., Jia, H., Cai, X., Zhong, H., Feng, Q., Sunagawa, S.,  
6 Arumugam, M., Kultima, J.R., Prifti, E., Nielsen, T., Juncker, A.S., Manichanh, C.,  
7 Chen, B., Zhang, W., Levenez, F., Wang, J., Xu, X., Xiao, L., Liang, S., Zhang, D.,  
8 Zhang, Z., Chen, W., Zhao, H., Al-Aama, J.Y., Edris, S., Yang, H., Wang, J., Hansen,  
9 T., Nielsen, H.B., Brunak, S., Kristiansen, K., Guarner, F., Pedersen, O., Doré, J.,  
10 Ehrlich, S.D., Bork, P., Wang, J., 2014. An integrated catalog of reference genes in  
11 the human gut microbiome. *Nat. Biotechnol.* 32, 834–841.  
12 doi:10.1073/pnas.1530509100
- 13 Milshteyn, A., Colosimo, D.A., Brady, S.F., 2018. Accessing Bioactive Natural Products  
14 from the Human Microbiome. *Cell Host Microbe* 23, 725–736.  
15 doi:10.1016/j.chom.2018.05.013
- 16 Morone, F., Makse, H.A., 2015. Influence maximization in complex networks through  
17 optimal percolation. *arXiv*. doi:10.1038/nature14604
- 18 Nayfach, S., Shi, Z.J., Seshadri, R., Pollard, K.S., Kyrpides, N.C., 2019. New insights  
19 from uncultivated genomes of the global human gut microbiome. *Nature* 568, 505–  
20 510. doi:10.1038/s41586-019-1058-x
- 21 Nurk, S., Meleshko, D., Korobeynikov, A., Pevzner, P.A., 2017. metaSPAdes: a new  
22 versatile metagenomic assembler. *Genome Res* 27, 824–834.  
23 doi:10.1101/gr.213959.116
- 24 Olm, M.R., Brown, C.T., Brooks, B., Banfield, J.F., 2017. dRep: a tool for fast and  
25 accurate genomic comparisons that enables improved genome recovery from  
26 metagenomes through de-replication. *Nature Publishing Group* 11, 2864–2868.  
27 doi:10.1038/ismej.2017.126
- 28 Olm, M.R., Crits-Christoph, A., Bouma-Gregson, K., Firek, B.A., Morowitz, M.J.,  
29 Banfield, J.F., 2021. inStrain profiles population microdiversity from metagenomic  
30 data and sensitively detects shared microbial strains. *Nat. Biotechnol.* 39, 727–736.  
31 doi:10.1038/s41587-020-00797-0
- 32 Parks, D.H., Imelfort, M., Skennerton, C.T., Hugenholtz, P., Tyson, G.W., 2015. CheckM:  
33 assessing the quality of microbial genomes recovered from isolates, single cells, and  
34 metagenomes. *Genome Res* 25, 1043–1055. doi:10.1101/gr.186072.114
- 35 Pasolli, E., Asnicar, F., Manara, S., Zolfo, M., Karcher, N., Armanini, F., Beghini, F.,  
36 Manghi, P., Tett, A., Ghensi, P., Collado, M.C., Rice, B.L., DuLong, C., Morgan,  
37 X.C., Golden, C.D., Quince, C., Huttenhower, C., Segata, N., 2019. Extensive  
38 Unexplored Human Microbiome Diversity Revealed by Over 150,000 Genomes from  
39 Metagenomes Spanning Age, Geography, and Lifestyle. *Cell* 176, 649–662.e20.  
40 doi:10.1016/j.cell.2019.01.001
- 41 Peng, G.-S., Wu, J., 2016. Optimal network topology for structural robustness based on  
42 natural connectivity. *Physica A: Statistical Mechanics and its Applications* 443, 212–  
43 220. doi:10.1016/j.physa.2015.09.023
- 44 Ramakrishnan, V.R., Frank, D.N., 2018. Microbiome in patients with upper airway  
45 disease: Moving from taxonomic findings to mechanisms and causality. *J Allergy*  
46 *Clin Immunol* 142, 73–75. doi:10.1016/j.jaci.2018.05.006

- 1 Rhee, R.L., Lu, J., Bittinger, K., Lee, J.-J., Mattei, L.M., Sreih, A.G., Chou, S., Miner,  
2 J.J., Cohen, N.A., Kelly, B.J., Lee, H., Grayson, P.C., Collman, R.G., Merkel, P.A.,  
3 2021. Dynamic Changes in the Nasal Microbiome Associated With Disease Activity  
4 in Patients With Granulomatosis With Polyangiitis. *Arthritis Rheumatol* 73, 1703–  
5 1712. doi:10.1002/art.41723
- 6 Salavaty, A., Ramialison, M., Currie, P.D., 2020. Integrated Value of Influence: An  
7 Integrative Method for the Identification of the Most Influential Nodes within  
8 Networks. *Patterns* 1, 100052. doi:10.1016/j.patter.2020.100052
- 9 Schloissnig, S., Arumugam, M., Sunagawa, S., Mitreva, M., Tap, J., Zhu, A., Waller, A.,  
10 Mende, D.R., Kultima, J.R., Martin, J., Kota, K., Sunyaev, S.R., Weinstock, G.M.,  
11 Bork, P., 2013. Genomic variation landscape of the human gut microbiome. *Nature*  
12 493, 45–50. doi:10.1038/nature11711
- 13 Scully, E.P., Haverfield, J., Ursin, R.L., Tannenbaum, C., Klein, S.L., 2020. Considering  
14 how biological sex impacts immune responses and COVID-19 outcomes. *Nat Rev*  
15 *Immunol* 20, 442–447. doi:10.1038/s41577-020-0348-8
- 16 Segata, N., Waldron, L., Ballarini, A., Narasimhan, V., Jousson, O., Huttenhower, C.,  
17 2012. Metagenomic microbial community profiling using unique clade-specific  
18 marker genes. *Nature Methods* 9, 811–814. doi:10.1038/nmeth.2066
- 19 Shah, V., 2021. Letter to the Editor: Microbiota in the Respiratory System-A Possible  
20 Explanation to Age and Sex Variability in Susceptibility to SARS-CoV-2. *Microbiol*  
21 *Insights* 14, 1178636120988604. doi:10.1177/1178636120988604
- 22 Sieber, C.M.K., Probst, A.J., Sharrar, A., Thomas, B.C., Hess, M., Tringe, S.G., Banfield,  
23 J.F., 2018. Recovery of genomes from metagenomes via a dereplication, aggregation  
24 and scoring strategy. *Nat Microbiol* 3, 836–843. doi:10.1038/s41564-018-0171-1
- 25 Sinha, T., Vila, A.V., Garmaeva, S., Jankipersadsing, S.A., Imhann, F., Collij, V., Bonder,  
26 M.J., Jiang, X., Gurry, T., Alm, E.J., D'Amato, M., Weersma, R.K., Scherjon, S.,  
27 Wijmenga, C., Fu, J., Kurilshikov, A., Zhernakova, A., 2018. Analysis of 1135 gut  
28 metagenomes identifies sex- specific resistome profiles. *Gut Microbes* 00, 1–9.  
29 doi:10.1080/19490976.2018.1528822
- 30 Stewart, R.D., Auffret, M.D., Warr, A., Wiser, A.H., Press, M.O., Langford, K.W.,  
31 Liachko, I., Snelling, T.J., Dewhurst, R.J., Walker, A.W., Roehe, R., Watson, M.,  
32 2018. Assembly of 913 microbial genomes from metagenomic sequencing of the cow  
33 rumen. *Nat Commun* 9, 870. doi:10.1038/s41467-018-03317-6
- 34 Stubbendieck, R.M., May, D.S., Chevrette, M.G., Temkin, M.I., Wendt-Pienkowski, E.,  
35 Cagnazzo, J., Carlson, C.M., Gern, J.E., Currie, C.R., 2019. Competition among  
36 Nasal Bacteria Suggests a Role for Siderophore-Mediated Interactions in Shaping the  
37 Human Nasal Microbiota. *Appl. Environ. Microbiol.* 85. doi:10.1128/AEM.02406-18
- 38 Sugimoto, Y., Camacho, F.R., Wang, S., Chankhamjon, P., Odabas, A., Biswas, A.,  
39 Jeffrey, P.D., Donia, M.S., 2019. A metagenomic strategy for harnessing the  
40 chemical repertoire of the human microbiome. *Science* 366.  
41 doi:10.1126/science.aax9176
- 42 Tipton, L., Müller, C.L., Kurtz, Z.D., Huang, L., Kleerup, E., Morris, A., Bonneau, R.,  
43 Ghedin, E., 2018. Fungi stabilize connectivity in the lung and skin microbial  
44 ecosystems. *Microbiome* 6, 12. doi:10.1186/s40168-017-0393-0
- 45 Vahidy, F.S., Pan, A.P., Ahnstedt, H., Munshi, Y., Choi, H.A., Tiruneh, Y., Nasir, K.,  
46 Kash, B.A., Andrieni, J.D., McCullough, L.D., 2021. Sex differences in susceptibility,

- 1 severity, and outcomes of coronavirus disease 2019: Cross-sectional analysis from a
- 2 diverse US metropolitan area. *PLoS ONE* 16, e0245556.
- 3 doi:10.1371/journal.pone.0245556
- 4 Viegli, G., Maio, S., Fasola, S., Baldacci, S., 2020. Global Burden of Chronic Respiratory
- 5 Diseases. *J Aerosol Med Pulm Drug Deliv* 33, 171–177.
- 6 doi:10.1089/jamp.2019.1576
- 7 Woyke, T., 2019. Beyond the census of human gut dwellers. *Nature Reviews*
- 8 *Microbiology* 17, 401. doi:10.1038/s41579-019-0220-7
- 9 Wu, B.G., Sulaiman, I., Wang, J., Shen, N., Clemente, J.C., Li, Y., Laumbach, R.J., Lu,
- 10 S.-E., Udasin, I., Le-Hoang, O., Perez, A., Alimokhtari, S., Black, K., Plietz, M.,
- 11 Twumasi, A., Sanders, H., Malecha, P., Kapoor, B., Scaglione, B.D., Wang, A.,
- 12 Blazoski, C., Weiden, M.D., Rapoport, D.M., Harrison, D., Chitkara, N., Vicente, E.,
- 13 Marin, J.M., Sunderram, J., Ayappa, I., Segal, L.N., 2019. Severe Obstructive Sleep
- 14 Apnea Is Associated with Alterations in the Nasal Microbiome and an Increase in
- 15 Inflammation. *American Journal of Respiratory and Critical Care Medicine* 199, 99–
- 16 109. doi:10.1164/rccm.201801-0119OC
- 17 Wu, J., Mauricio, B., Tan, Y.-J., Deng, H.-Z., 2010. Natural connectivity of complex
- 18 networks. *Chinese Physics Letters* 27, 1–4. doi:10.1088/0256-307X/27/7/078902
- 19 Wu, Y.-W., Simmons, B.A., Singer, S.W., 2016. MaxBin 2.0: an automated binning
- 20 algorithm to recover genomes from multiple metagenomic datasets. *Bioinformatics*
- 21 32, 605–607. doi:10.1093/bioinformatics/btv638
- 22 Xie, H., Guo, R., Zhong, H., Feng, Q., Lan, Z., Qin, B., Ward, K.J., Jackson, M.A., Xia,
- 23 Y., Chen, X., Chen, B., Xia, H., Xu, C., Li, F., Xu, X., Al-Aama, J.Y., Yang, H.,
- 24 Wang, J., Kristiansen, K., Wang, J., Steves, C.J., Bell, J.T., Li, J., Spector, T.D., Jia,
- 25 H., 2016. Shotgun Metagenomics of 250 Adult Twins Reveals Genetic and
- 26 Environmental Impacts on the Gut Microbiome. *Cell Systems* 3, 572–584.e3.
- 27 doi:10.1016/j.cels.2016.10.004
- 28 Yan, M., Pamp, S.J., Fukuyama, J., Hwang, P.H., Cho, D.-Y., Holmes, S., Relman, D.A.,
- 29 2013. Nasal microenvironments and interspecific interactions influence nasal
- 30 microbiota complexity and *S. aureus* carriage. *Cell Host Microbe* 14, 631–640.
- 31 doi:10.1016/j.chom.2013.11.005
- 32 Yang, F., Sun, J., Luo, H., Ren, H., Zhou, H., Lin, Y., Han, M., Chen, B., Liao, H., Brix,
- 33 S., Li, J., Yang, H., Kristiansen, K., Zhong, H., 2020. Assessment of fecal DNA
- 34 extraction protocols for metagenomic studies. *Gigascience* 9.
- 35 doi:10.1093/gigascience/giaa071
- 36 Zamkovaya, T., Foster, J.S., Cr  cy-Lagard, V. de, Conesa, A., 2020. A network approach
- 37 to elucidate and prioritize microbial dark matter in microbial communities. *The*
- 38 *ISME Journal* 15, 228–244. doi:10.1038/s41396-020-00777-x
- 39 Zhang, X., Zhong, H., Li, Y., Shi, Z., Ren, H., Zhang, Z., Zhou, X., Tang, S., Han, X.,
- 40 Lin, Y., Yang, F., Wang, D., Fang, C., Fu, Z., Wang, L., Zhu, S., Hou, Y., Xu, X.,
- 41 Yang, H., Wang, J., Kristiansen, K., Li, J., Ji, L., 2021. Sex- and age-related
- 42 trajectories of the adult human gut microbiota shared across populations of different
- 43 ethnicities. *Nature Aging* 1–31. doi:10.1038/s43587-020-00014-2
- 44 Zhang, X.-K., Wu, J., Tan, Y.-J., Deng, H.-Z., Li, Y., 2013. Structural Robustness of
- 45 Weighted Complex Networks Based on Natural Connectivity. *Chinese Physics*
- 46 *Letters* 30, 1–4. doi:10.1088/0256-307X/30/10/108901

- 1 Zhao, T., Liu, H., Roeder, K., Lafferty, J., Wasserman, L., 2012. The huge Package for  
2 High-dimensional Undirected Graph Estimation in R. *J Mach Learn Res* 13, 1059–  
3 1062.
- 4 Zhu, J., Tian, L., Chen, P., Han, M., Song, L., Tong, X., Sun, X., Yang, F., Lin, Z., Liu,  
5 X., Liu, C., Wang, X., Lin, Y., Cai, K., Hou, Y., Xu, X., Yang, H., Wang, J.,  
6 Kristiansen, K., Xiao, L., Zhang, T., Jia, H., Jie, Z., 2021. Over 50,000  
7 Metagenomically Assembled Draft Genomes for the Human Oral Microbiome  
8 Reveal New Taxa. *Genomics, Proteomics & Bioinformatics* 1–43.  
9 doi:10.1016/j.gpb.2021.05.001
- 10 Zipperer, A., Konnerth, M.C., Laux, C., Berscheid, A., Janek, D., Weidenmaier, C.,  
11 Burian, M., Schilling, N.A., Slavetinsky, C., Marschal, M., Willmann, M., Kalbacher,  
12 H., Schitteck, B., Brötz-Oesterhelt, H., Grond, S., Peschel, A., Krismer, B., 2016.  
13 Human commensals producing a novel antibiotic impair pathogen colonization.  
14 *Nature* 535, 511–516. doi:10.1038/nature18634

## 17 **Methods**

### 18 **Collection of the nasal microbiome samples**

19 Extensive metadata and different biological samples were collected during physical  
20 examination in the 4D-SZ cohort as previously reported (Zhu et al., 2021). In this study,  
21 we collected anterior nare swabs from 1593 individuals of this cohort, with an average  
22 age of 29.9 ( $\pm 5.13$ ) years old, and sex information obtained for 439 males and 807  
23 females. Demographic characteristics of the participants were provided in Table S1.

24 The anterior nare samples were self-collected by the volunteers following three steps.  
25 First, the sterile swab was moistened with sterile water before use. Then the pre-  
26 moistened swab rotated three times around the inside of each nostril with approximately  
27 constant pressure. Last, dropping the swab into the 2ml BGI stabilizing reagent (Han et  
28 al., 2018) for the preservation of metagenome at room temperature and then stored at -80°C  
29 for long-term storage.

### 31 **DNA extraction, sequencing, and quality control**

DNA extraction of the stored samples was performed using the MagPure Stool DNA KF Kit B (MD5115, Magen) (Yang et al., 2020). Metagenomic sequencing was performed on the DNBSEQ platform (BGI, Shenzhen, China) (Q. Li et al., 2019) with 150 bp of paired-end reads, which generated 854.7 billion pairs of raw reads (on average 536.5 million paired reads per sample, 159.6 million pairs of standard deviation). The metapi pipeline (<https://github.com/ohmeta/metapi>) was used to process the sequencing data. Quality control was first performed with strict standards for filtering and trimming the reads (average Phred quality score  $\geq 20$  and length  $\geq 30$ ) using fastp v0.20.1 (S. Chen et al., 2018). Human reads were then removed using Bowtie2 2.4.2 (Langmead and Salzberg, 2012) (human genome GRCh38). In total, 4.2 terabases of high-quality paired-end reads were retained with average 96.35% host ratio (Table S2).

### **Recovery of the bacterial community**

A single sample assembly and single sample binning strategy was employed to reconstruct bacterial genomes from the preprocessed data using the metapi pipeline. Specifically, the high-quality reads of each sample were individually assembled by applying MEGAHIT v1.2.9 (D. Li et al., 2015) or SPAdes v3.15.2 (Nurk et al., 2017) (--meta). BWA-MEM v0.7.17 (H. Li and Durbin, 2009) with default parameters was then used to map reads back to the contigs, and the contig depth was calculated by jgi\_summarize\_bam\_contig\_depths (Kang et al., 2019). Metagenomic binning was performed with DAS Tool 1.1.2 (Sieber et al., 2018), combining CONCOCT v1.1.0 (Alneberg et al., 2014), MaxBin v2.2.7 (Y.-W. Wu et al., 2016) and MetaBAT2 v 2.15 (Kang et al., 2019) for each sample individually. CheckM v1.1.3 (Parks et al., 2015) was used to assess the quality of the MAGs. Bins with  $\geq 80\%$  completeness and  $\leq 10\%$  contamination were retained for further analysis (Stewart et al., 2018). All of the MAGs were then together dereplicated by dRep v3.0.1 (-pa 0.9 -sa 0.99 -nc 0.30 -cm larger -p 25) (Olm et al., 2017), in which the primary cluster using MASH with 90% ANI and the secondary cluster using ANImf with 99% ANI, resulting in 974 non-redundant MAGs.

The 16S rRNA sequences in the MAGs were searched by Barrnap v0.9 (--reject 0.01 --  
 evaluate 1e-3, <https://github.com/tseemann/barrnap>) and tRNA sequences in the MAGs  
 were searched by tRNAscan-SE 2.0.7 (Chan and Lowe, 2019) with default parameters.  
 Taxonomic classification of the 974 non-redundant MAGs was assigned using GTDB-Tk  
 v1.5.1 (Chaumeil et al., 2019) classify workflow with external Genome Taxonomy  
 Database release 95. The phylogenetic tree of the 974 MAGs was built using GTDB-Tk  
 v1.5.1. Genome-wide functional annotation was performed using EggNOG mapper  
 v2.1.3 (Cantalapiedra et al., 2021) based on EggNOG v5.0 database (Huerta-Cepas et al.,  
 2019). The bacterial biome profile was then generated using CoverM with genome mode  
 (--min-covered-fraction 0) (<https://github.com/wwood/CoverM>) based on the non-  
 redundant nasal bacterial MAGs catalog.

### **Characterization of fungal community composition**

High-quality cleaned reads were mapped to a manually curated database using kraken2  
 with default parameters to generate the fungal biome profile. This database contained  
 39,559 species in total, including human genome GRCh38, GTDB r95, fungi and protists  
 from NCBI.

### **Unsupervised clustering**

The weighted similarity network fusion (WSNF) analysis (Mac Aogáin et al., 2021) can  
 integrate multi-biome data and cluster samples into distinct groups using taxonomic  
 richness of each biome as the weight of SNF. In this study, for 1593 participants, we  
 filtered bacteria and fungi with relative abundance greater than 1e-4 and 1e-3,  
 respectively, in addition to a prevalence greater than 10%. Finally, 122 bacteria and 131  
 fungi remained. Three clusters were derived with WSNF from the filtered dataset. Other  
 parameters are set as default.



# 1    **Co-occurrence analysis of microbial interaction**

2    To mitigate the influence of spurious correlation, a modified co-occurrence analysis  
3    based on ensemble methods was implemented (Faust et al., 2012). In this study, we made  
4    modification of this co-occurrence analysis by replacing some methods in the ensemble.  
5    First, we implemented COAT (composition-adjusted thresholding) (Cao et al., 2018)  
6    instead of Spearman and Person correlation. Then we replaced HUGE (High-dimensional  
7    Undirected Graph Estimation) (Zhao et al., 2012) with GBLM (generalized boosted  
8    linear models). Last, the sign of the correlation depends on COAT and HUGE. Overall,  
9    the ensemble contained MI (mutual information), Bray-Curtis dissimilarity, COAT and  
10    HUGE. The final interaction score aggregated the normalized absolute edge scores, and  
11    the sign was assigned based on COAT and HUGE. The final *P*-value was merged using  
12    the weighted Simes test.

13    With the modified ensemble method, we conducted co-occurrence analysis on the filtered  
14    nasal microbiome dataset (as described in **Unsupervised clustering**) for males and  
15    females. Filtering out of the low abundance and low prevalence taxa of the microbiome  
16    data helped to avoid artificial interactions resulted from random noises though at the  
17    expense of sensitivity loss for weak signals. Following the co-occurrence analysis, the  
18    nasal microbial interaction networks were established with a threshold of *P*-value lower  
19    than 1e-3 for males and females.

20

# 21    **Stability of microbial co-occurrence network**

22    Natural connectivity is a robustness measure of complex networks (Morone and Makse,  
23    2015). Higher natural connectivity indicates higher network stability. In this study, we  
24    performed random attack by removing randomly selected nodes for 1000 times and  
25    assessed normalized natural connectivity for each remaining network (R package pulsar).  
26    The number of nodes removed was sequentially increased from 1 to all the nodes. The *P*-  
27    value of robustness between male and female networks was calculated following two  
28    steps. First, for each attacked network, compare the 1000 natural connectivity between

the two sexes with Wilcoxon rank-sum test. Second, a merged P-value was measured using the weighted Simes test, with the number of remaining nodes as the weight.

### **Selection of keystone taxa in the co-occurrence networks**

We selected keystones based on the IVI (Integrated Value of Influence) (Salavaty et al., 2020), which is an integrative method for the evaluation of node influence within a network. To determine the keystones of each network, we utilized a permutational approach by comparing each robustness attack along the IVI decreasing axis with random attacks (as control). The keystone set was then decided based on  $P$ -value  $< 0.001$  calculated from the 1000 permutations. Through analysis, we got 13 and 10 key players of male and female network, respectively.

### **pN/pS ratios**

SNVs of nonsynonymous and synonymous variants at the gene and genome levels were identified for the keystone taxa using inStrain (Olm et al., 2021). The pN/pS ratio was calculated using the formula  $((\text{nonsynonymous SNVs}/\text{nonsynonymous sites})/(\text{synonymous SNVs}/\text{synonymous sites}))$ .

### **BGCs prediction**

BGCs (biosynthetic gene clusters) type and location of non-redundant MAGs were predicted using AntiSMASH 6.0.0 (Blin et al., 2021) (`--cb-knownclusters`). Novel BGCs were defined which did not match the Minimum Information about a Biosynthetic Gene cluster (MIBiG) database.

### **Statistical analysis and data visualization.**

# 1    **LDA analysis**

2    For discriminant analysis of the microbiome between males and females, the effect size  
3    of linear discriminant analysis was implemented using the webtool available at  
4    <http://huttenhower.sph.harvard.edu/galaxy/>

# 5    **Permanova analysis**

6    ADONIS (permutational multivariate analysis of variance using distance matrices)  
7    testing between the observed clusters or sex was performed using R package vegan v2.5-  
8    7 with 4999 permutations.

# 9    **Diversity analysis.**

10    The nasal microbiome  $\alpha$ -diversity (within-sample diversity) was calculated using the  
11    Shannon index at the species level (R package vegan). The differences between males  
12    and females were assessed with Wilcoxon rank-sum test.

# 13    **Correlation of IVI and relative abundance**

14    The correlation between IVI and relative abundance of the keystone taxa was measured  
15    by Spearman's correlation.

# 16    **Visualization**

17    The co-occurrence network was visualized using Cytoscape 3.9.0. The heatmap of  
18    similarity score was drawn by ComplexHeatmap(2.10.0). The boxplot was drawn by  
19    ggpubr(2.10.0).

20

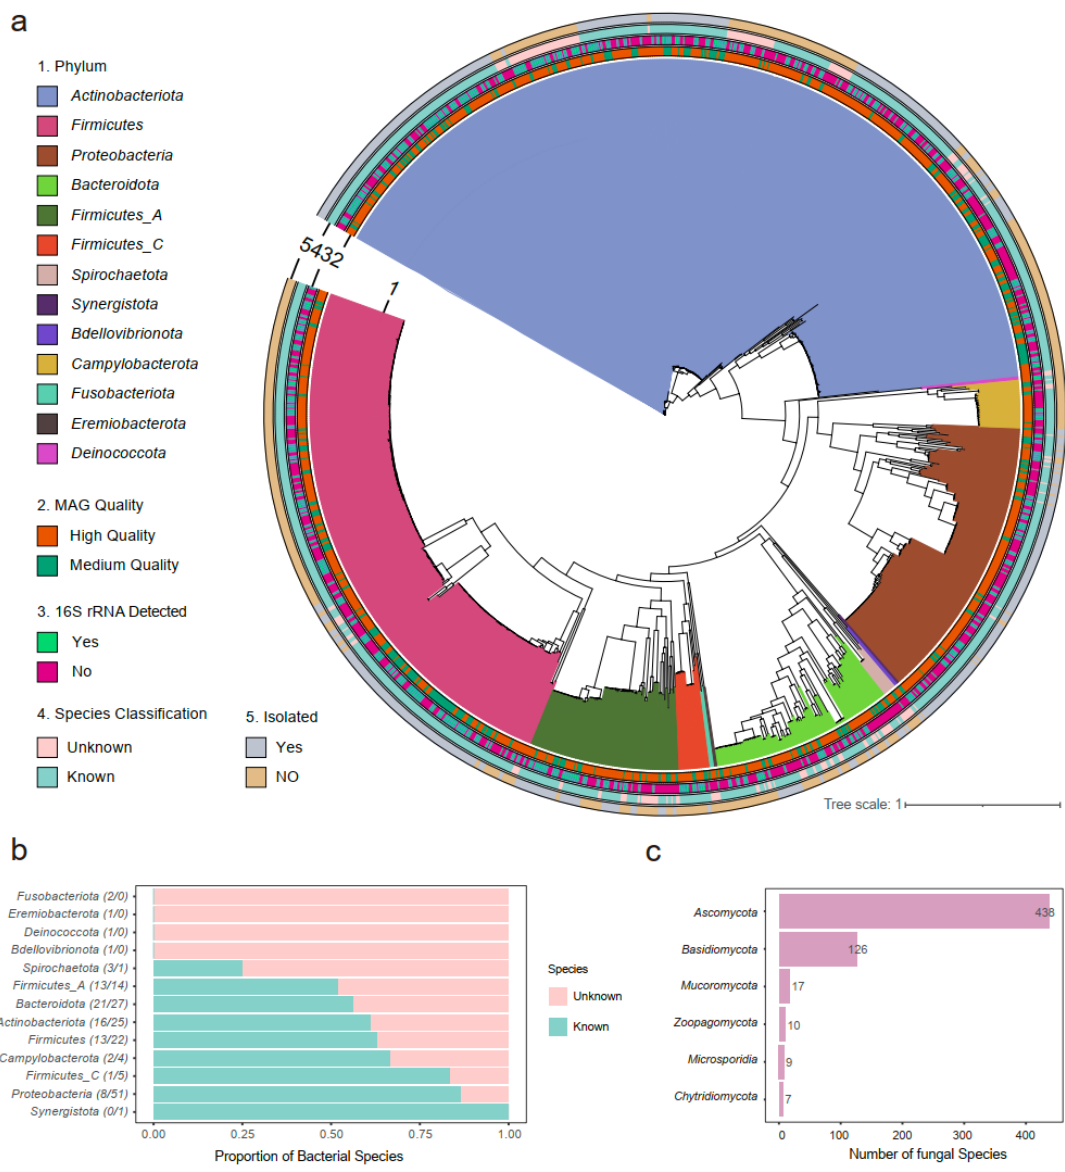

**Fig. 1 Overall representation of the microbes in anterior nares of healthy young adults.**

**a**, Phylogeny of 974 non-redundant bacterial MAGs (metagenome-assembled genomes) detected in anterior nares. It constituted five layers representing respectively: 1 for phylum, 2 for MAGs quality, 3 for if 16s rRNA detected, 4 for if classified in the species level and 5 for if isolated as depicted in the GTDB database. **b**, Proportion of unknown and known bacterial species in each phylum with the absolute number indicated in the brackets respectively. **c**, Number of fungal species in each phylum.

1

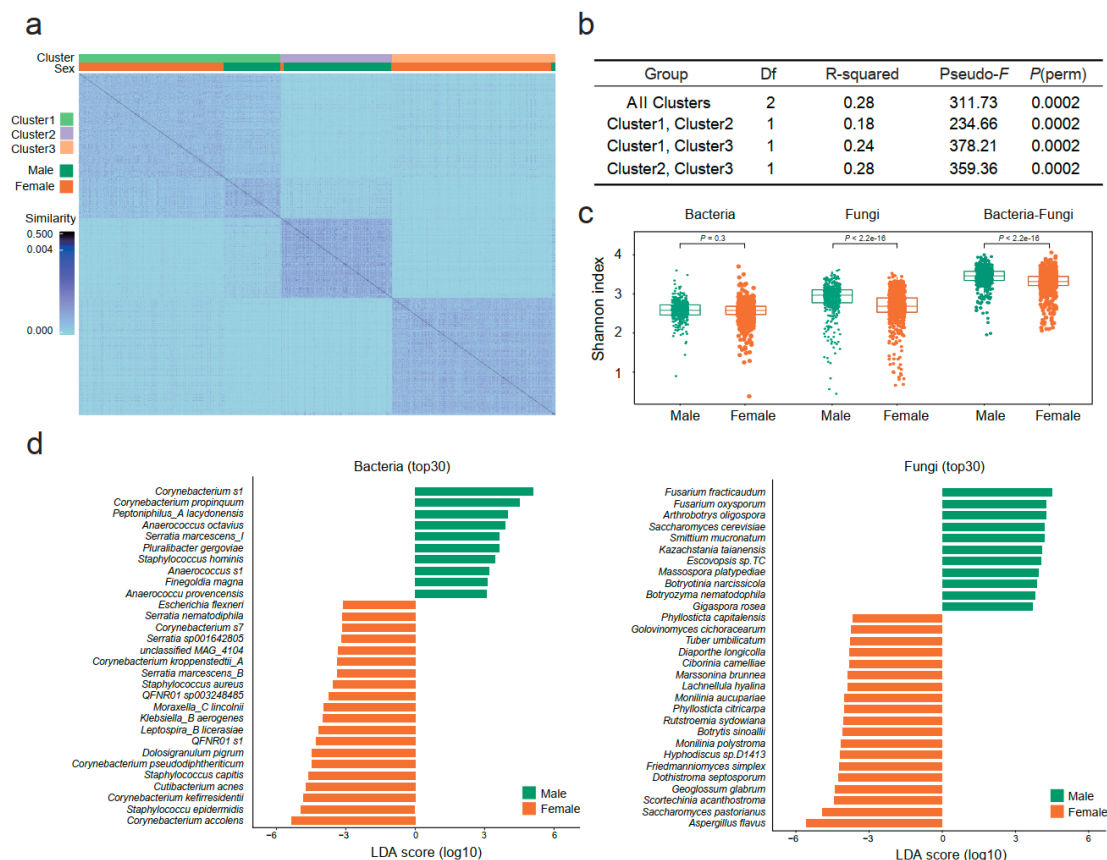

2

### Figure 2. Unsupervised clustering and sex differences in the nasal microbiome composition.

**a**, Heatmap illustrating WSNF similarity scores stratified by unsupervised clustering through bacterial and fungal datasets, with cluster and sex information indicated by the bars on the top. **b**, Permanova analysis (permutational multivariate analysis of variance using distance matrices) results demonstrating significant variation of the nasal microbiome among the observed clusters. **c**, Comparison of  $\alpha$ -diversity (Shannon index) between males (green) and females (brown) for bacteria ( $P=0.3$ ), fungi ( $P<2.2\times 10^{-16}$ ) and bacteria-fungi integrated ( $P<2.2\times 10^{-16}$ ) respectively through Wilcoxon test. **d**, Comparison of LDA effect size (LEfSe) between males (green) and females (brown) illustrating discriminative taxa of bacteria (left) and fungi (right). Only the top 30 discriminative taxa by LDA score were shown.

1

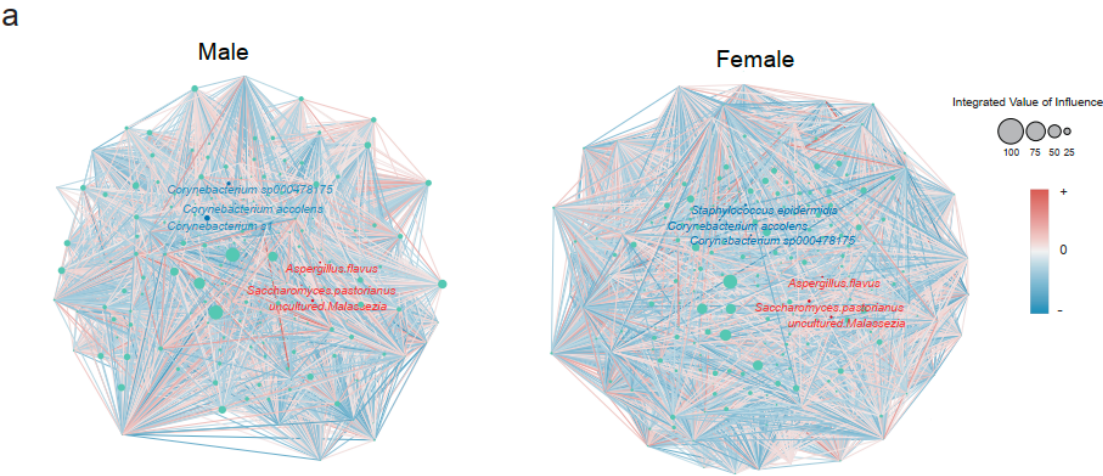

**b**

|                                                                        | Male              | Female            |
|------------------------------------------------------------------------|-------------------|-------------------|
| Total no. of microbes in the entire network (no. of nodes)             | 258               | 258               |
| Total no. of interactions in the entire network (no. of edges)         | 41,526            | 42,062            |
| Negative interactions of the entire network                            | 21726/41526 (52%) | 22766/42062 (54%) |
| Negative interactions of the bacterial-domain sub-network              | 3048/7928 (38%)   | 2436/6676 (36%)   |
| Negative interactions of the fungal-domain sub-network                 | 4434/13030 (34%)  | 6082/14374 (42%)  |
| Negative interactions of the cross-domain (bacteria-fungi) sub-network | 14244/20568 (69%) | 14248/21012 (68%) |

**c**

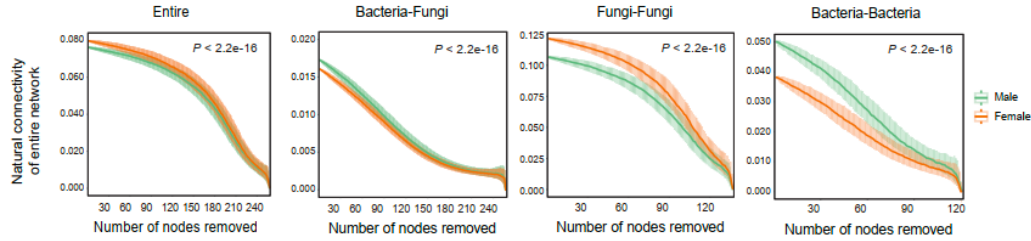

**d**

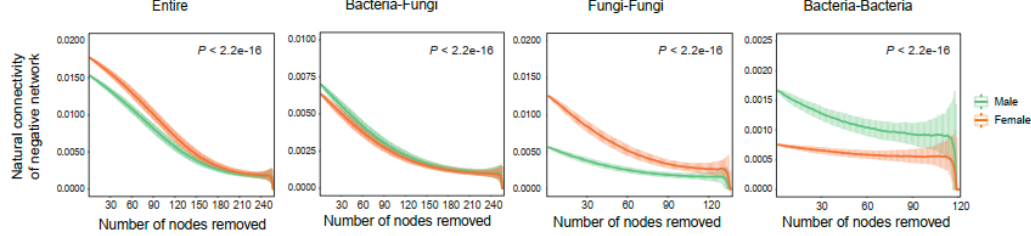

2

**Fig3. Network characterization of the nasal microbiome for males and females**

**a**, Nasal microbial interaction network of males and females. Node size represents the integrated value of influence (IVI) for each taxon. Red and blue lines indicate positive and negative interactions respectively. The top 3 bacteria and fungi by relative abundance



are annotated with blue and red fonts respectively. **b**, Summary table of network characteristics of males and females **c-d**, Attack robustness of each network of total interaction (c) and negative interaction (d) for males (green) and females (brown) as measured by natural connectivity. Line and box reflect median and IQRs.

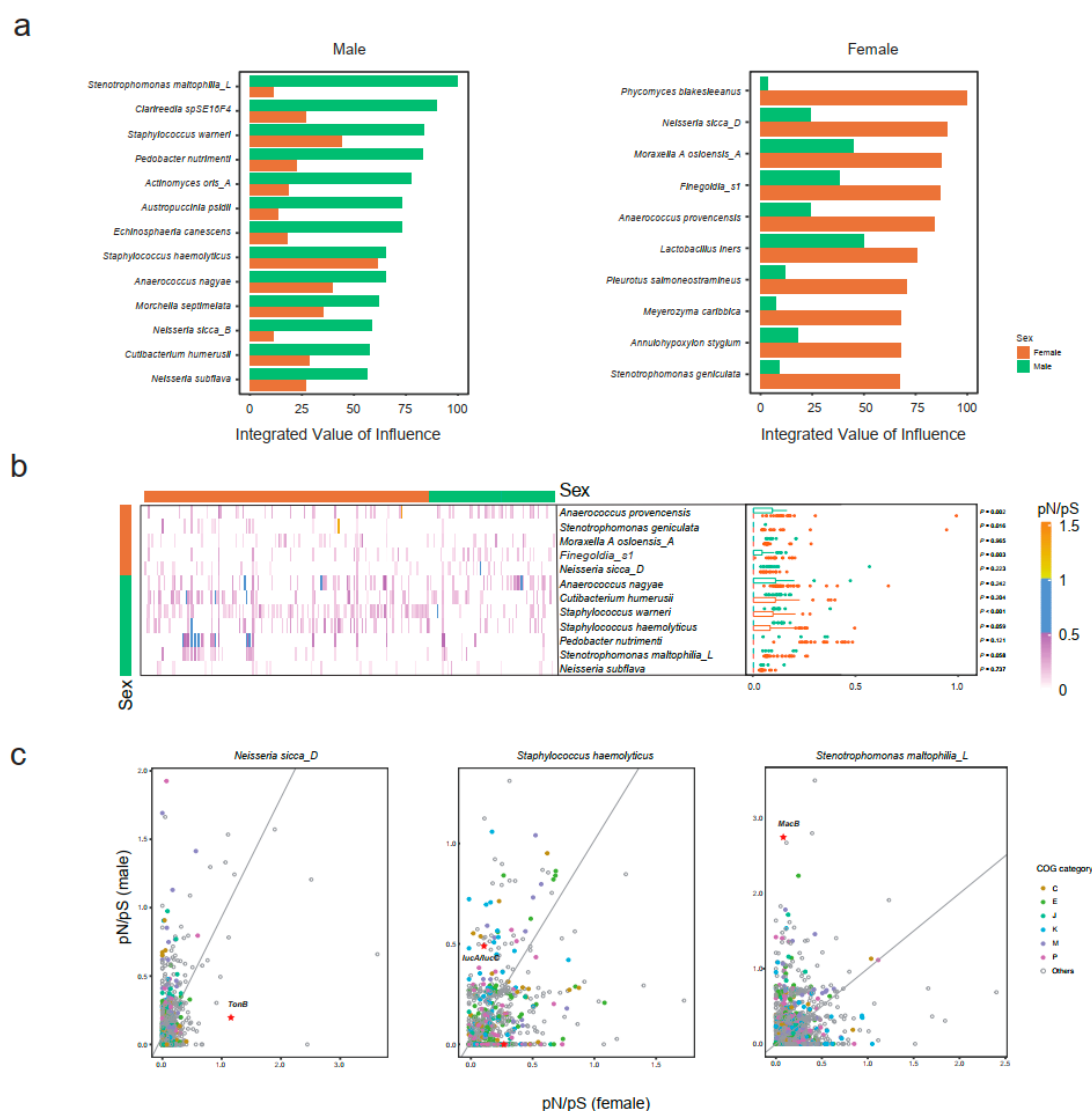

**Fig 4. Characteristics of the keystone taxa identified in male and female nasal microbial interaction networks**

**a**, The integrated value of influence (IVI) of the keystone taxa of males (left) and females (right). Green and brown bars represent the IVI of the respective taxa in the male and female networks respectively. **b**, The pN/pS ratio of keystone bacteria for individuals

1 shown by heatmap and boxplot. Green and brown represent male and female respectively  
2 (vertical bar: keystone belongs to male or female network; horizontal bar: male and  
3 female individuals; boxplot: pN/pS ratios for male and female individuals). **c**, The pN/pS  
4 ratio for 3 bacterial keystones in gene levels of male (y-axis) and female (x-axis)  
5 participants with COG category. The stars represent the genes which have been described  
6 in detail in the main text.  
7



a

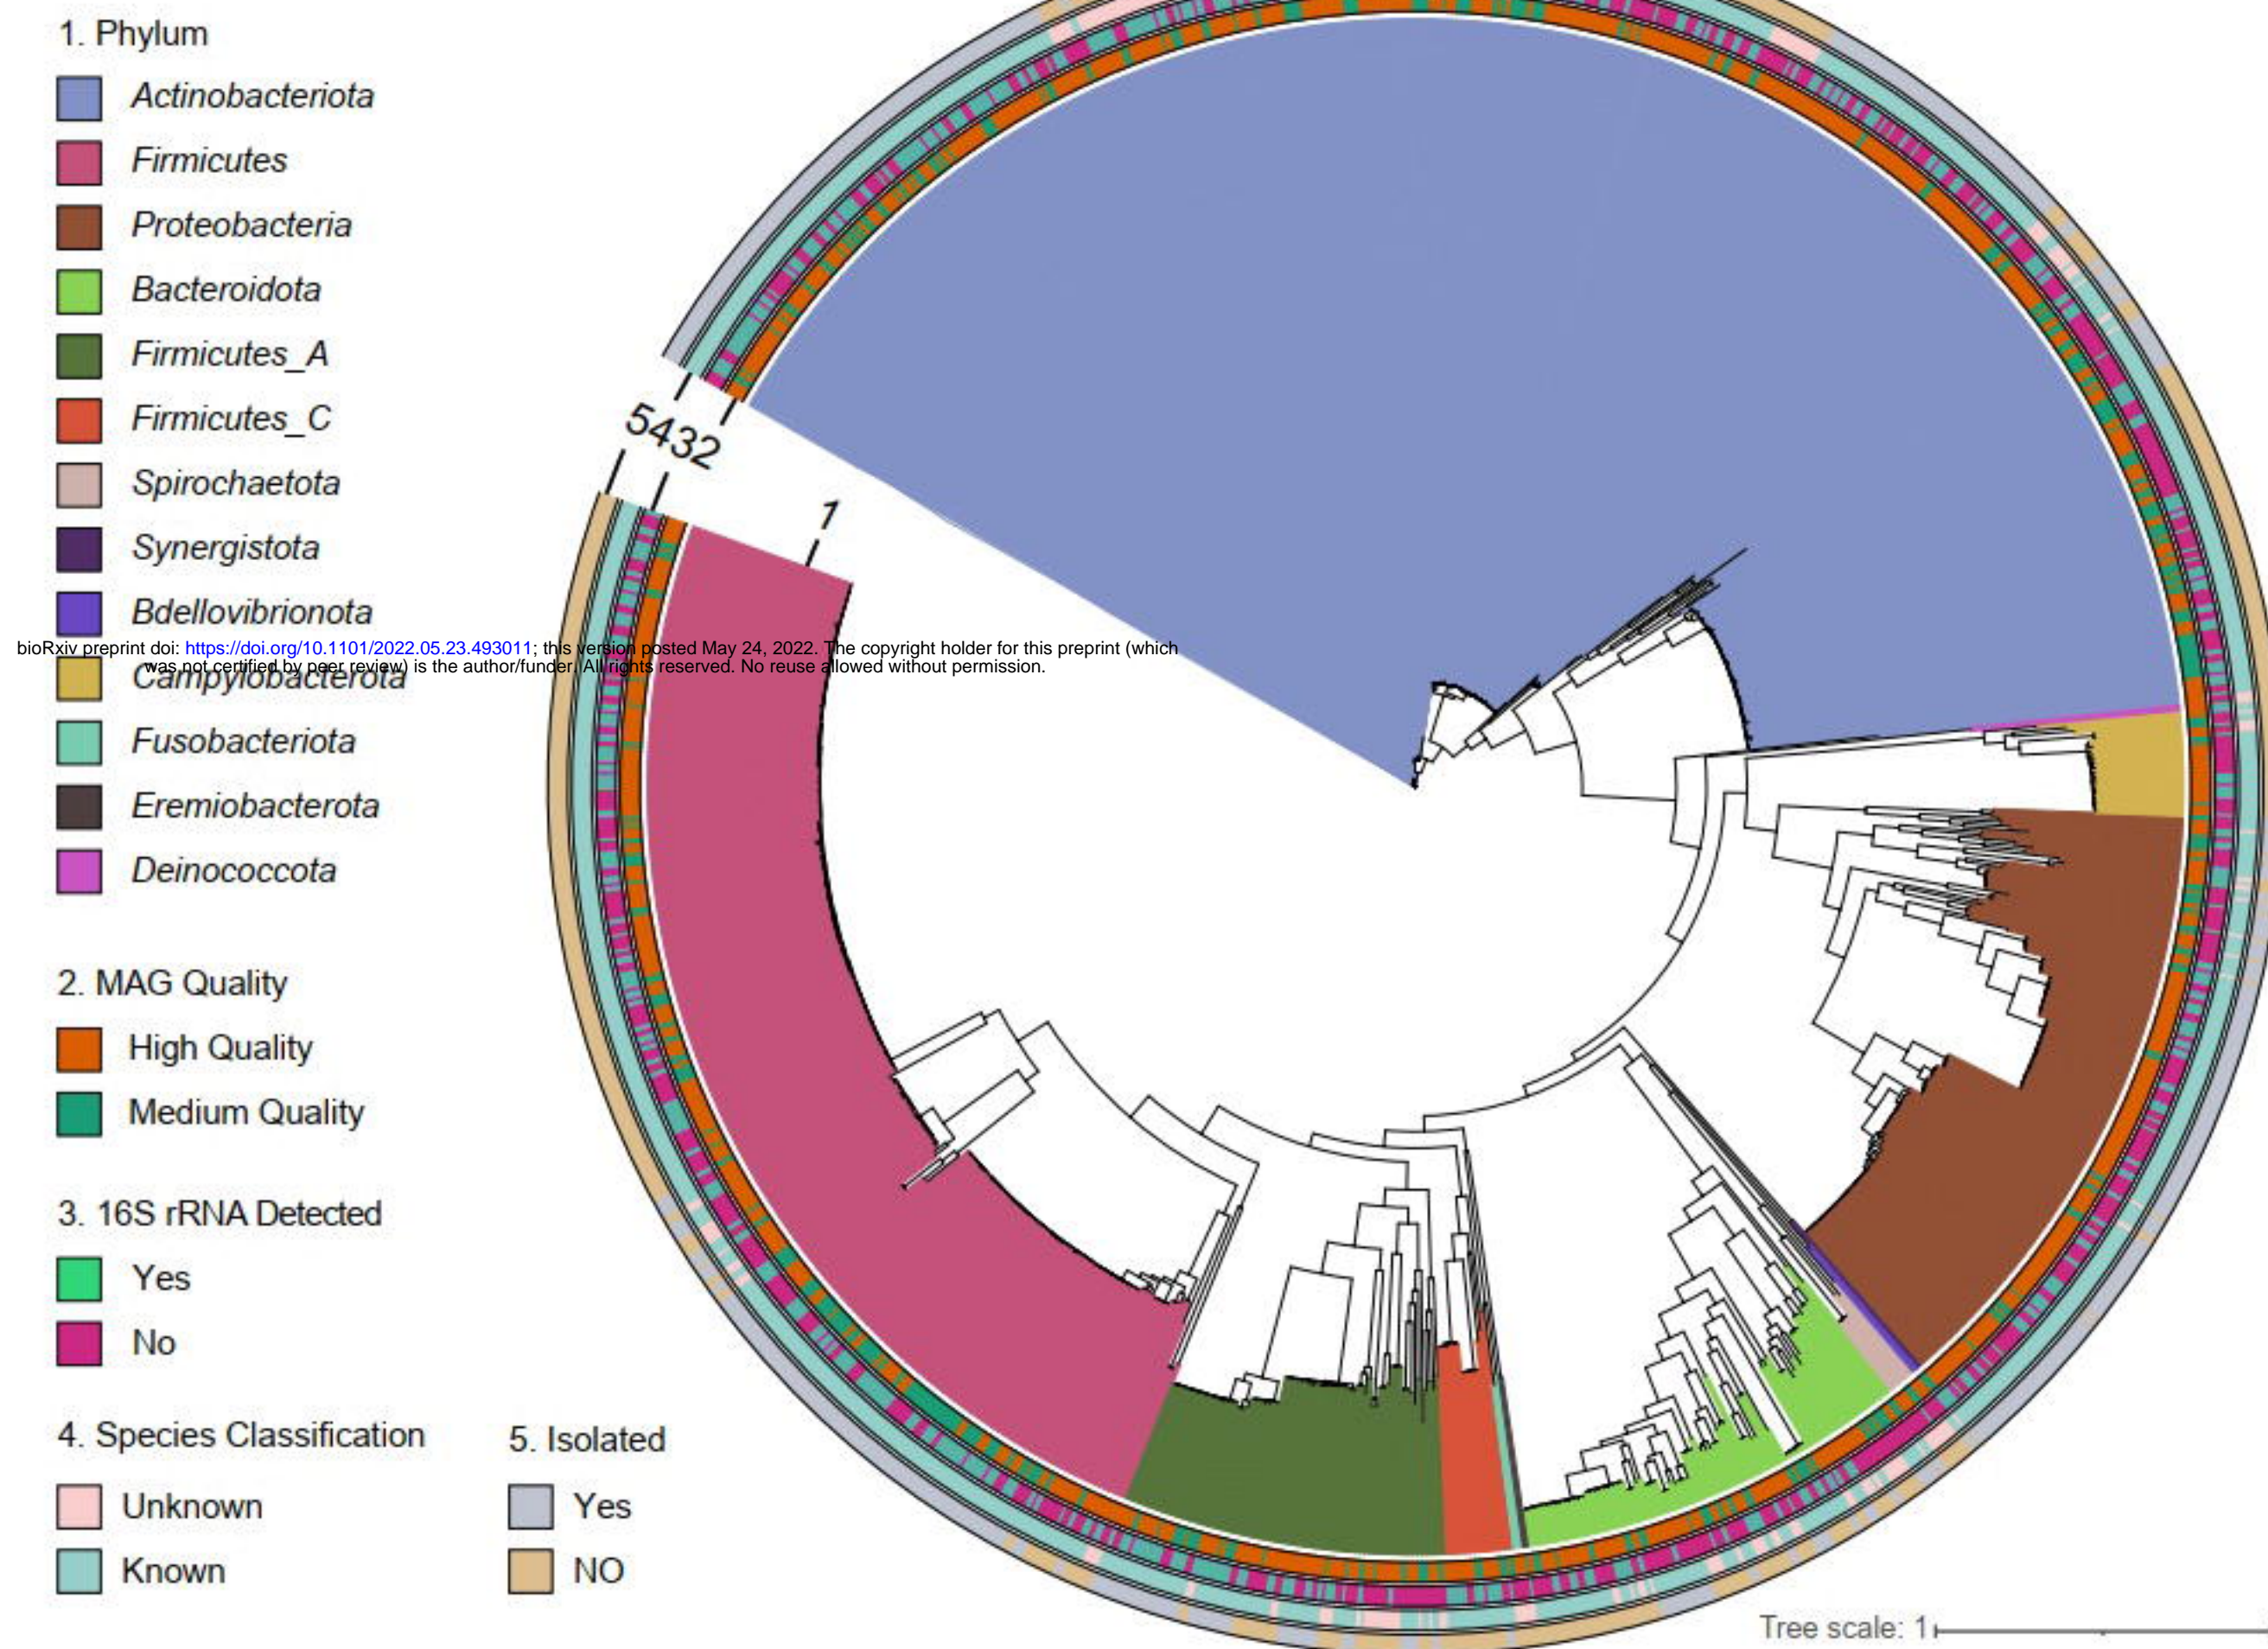

b

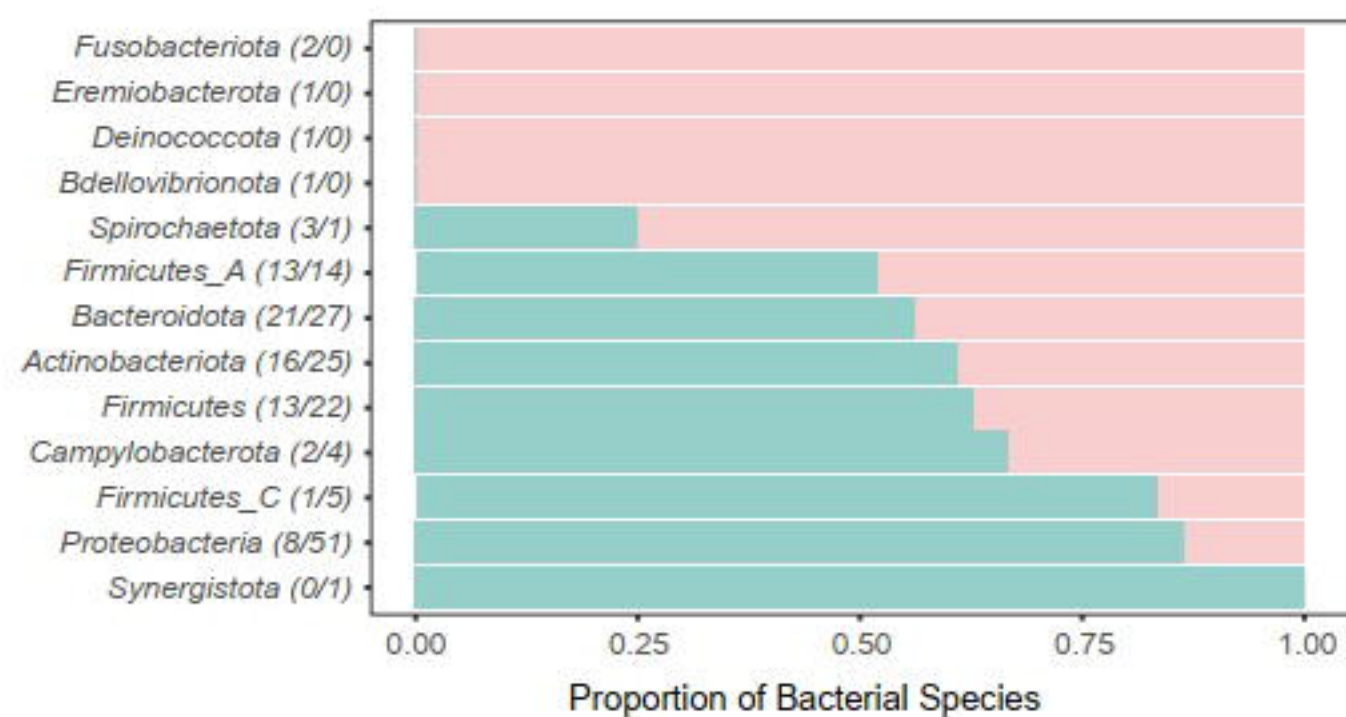

c

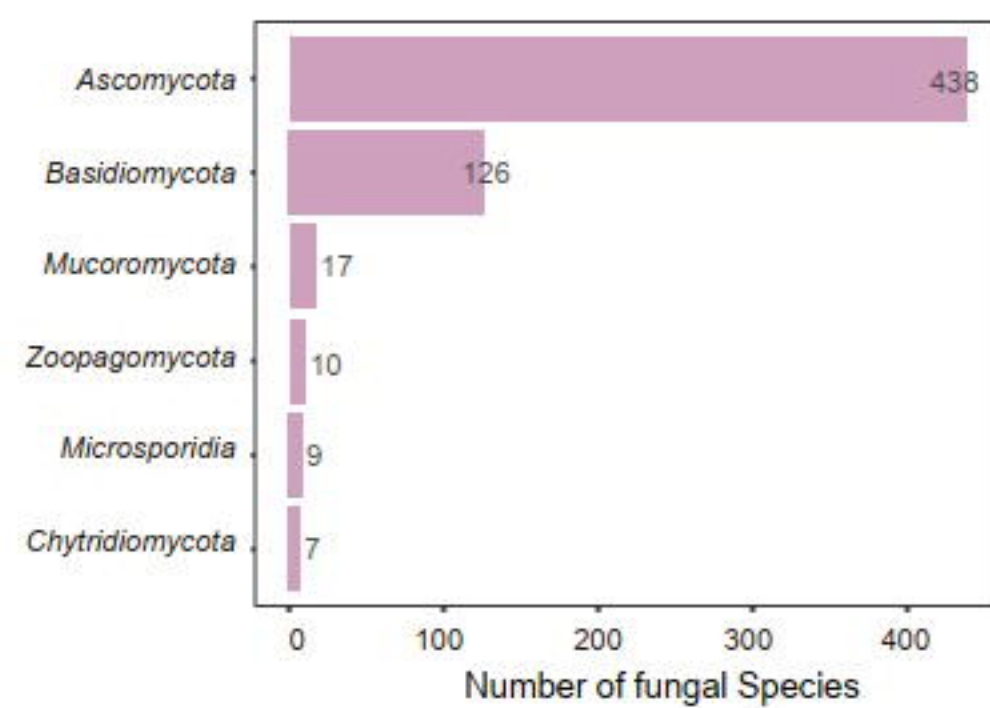



a

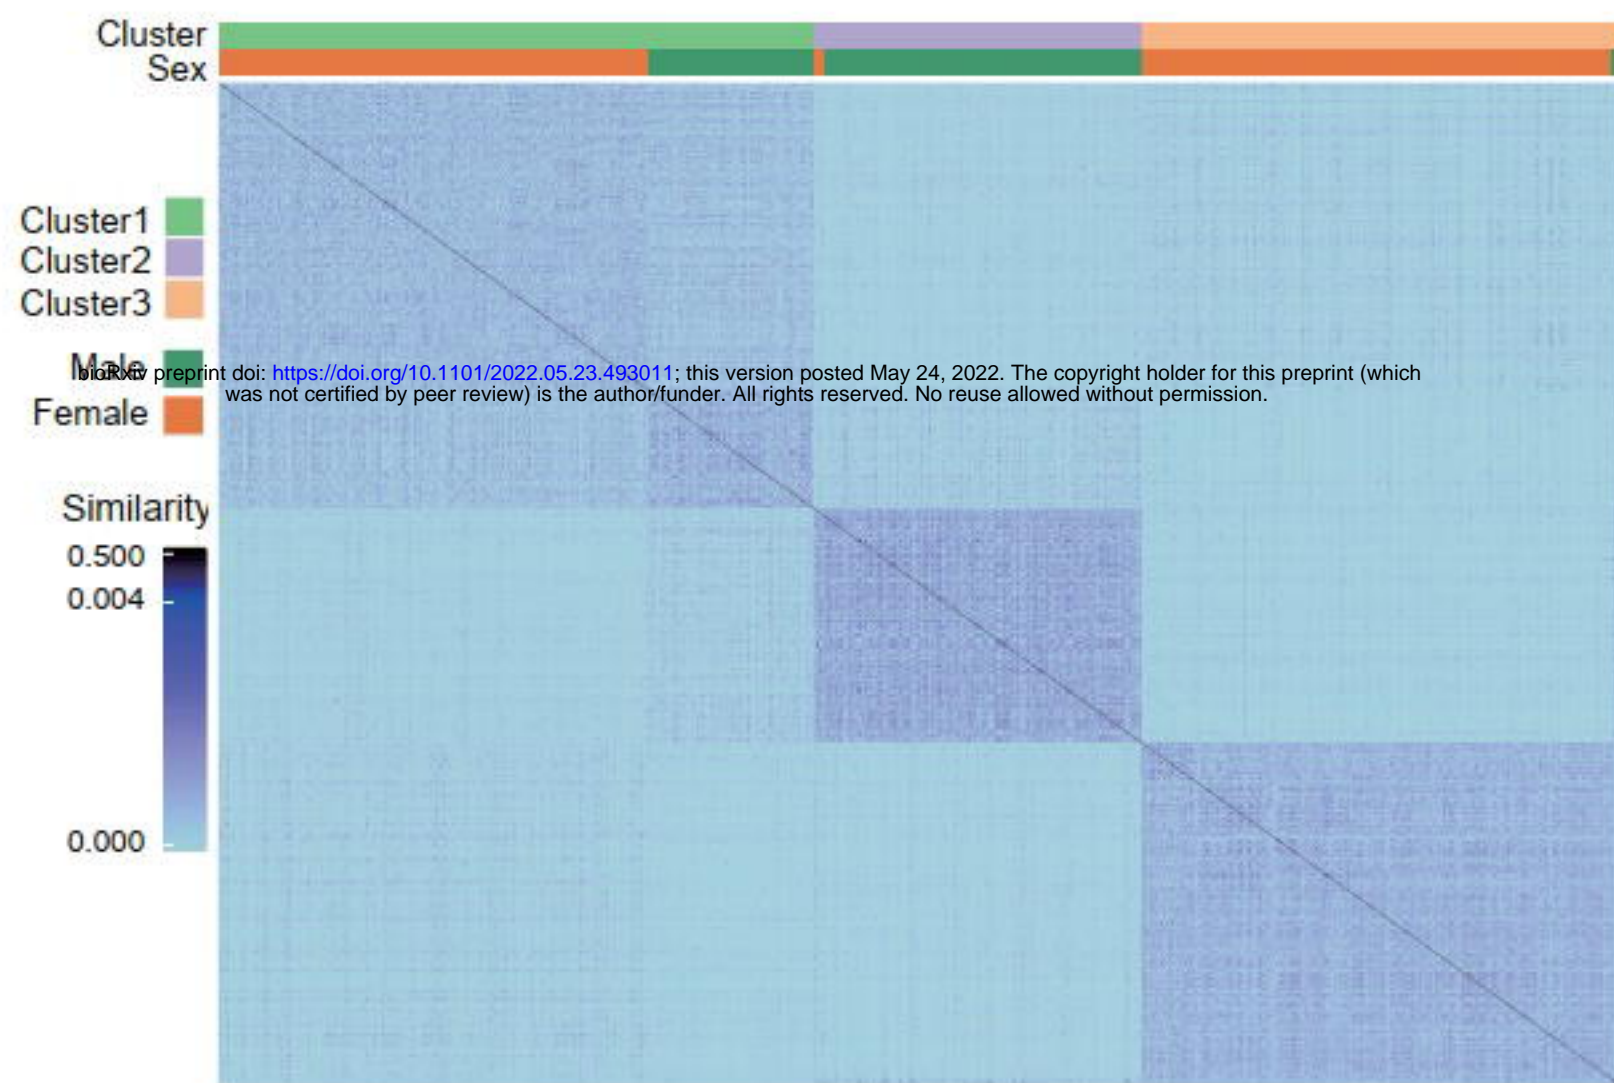

b

| Group              | Df | R-squared | Pseudo-F | P(perm) |
|--------------------|----|-----------|----------|---------|
| All Clusters       | 2  | 0.28      | 311.73   | 0.0002  |
| Cluster1, Cluster2 | 1  | 0.18      | 234.66   | 0.0002  |
| Cluster1, Cluster3 | 1  | 0.24      | 378.21   | 0.0002  |
| Cluster2, Cluster3 | 1  | 0.28      | 359.36   | 0.0002  |

c

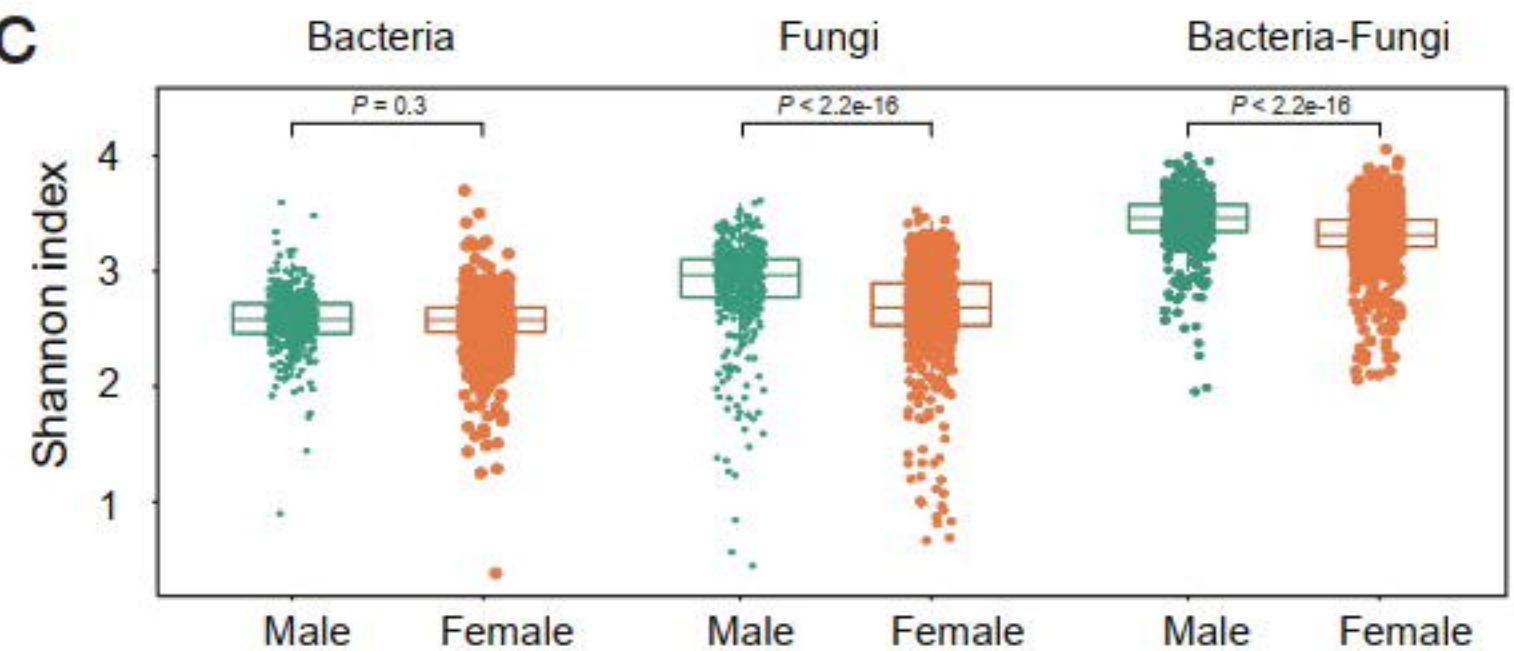

d

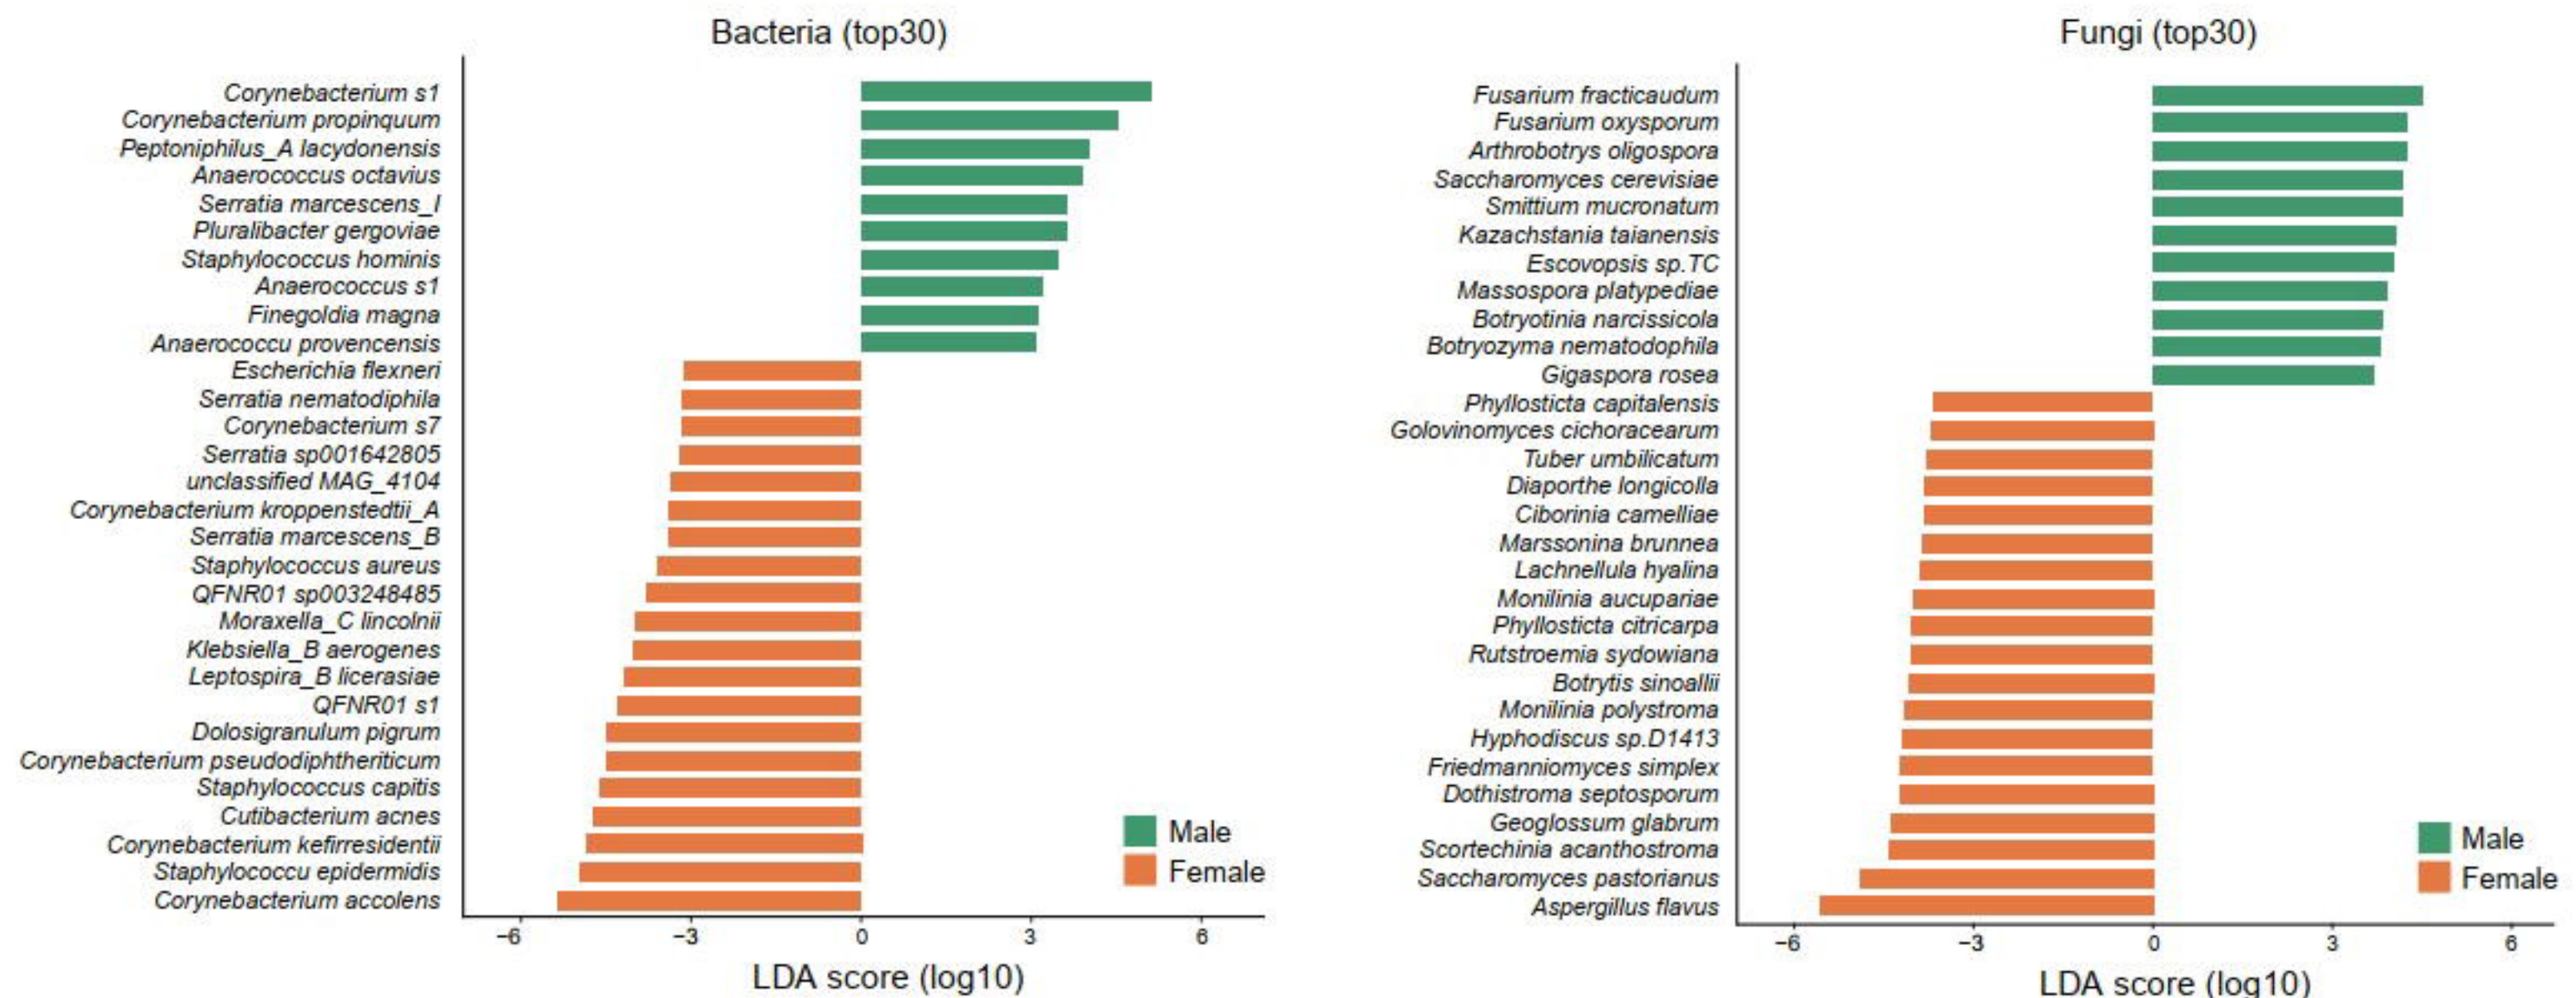



a

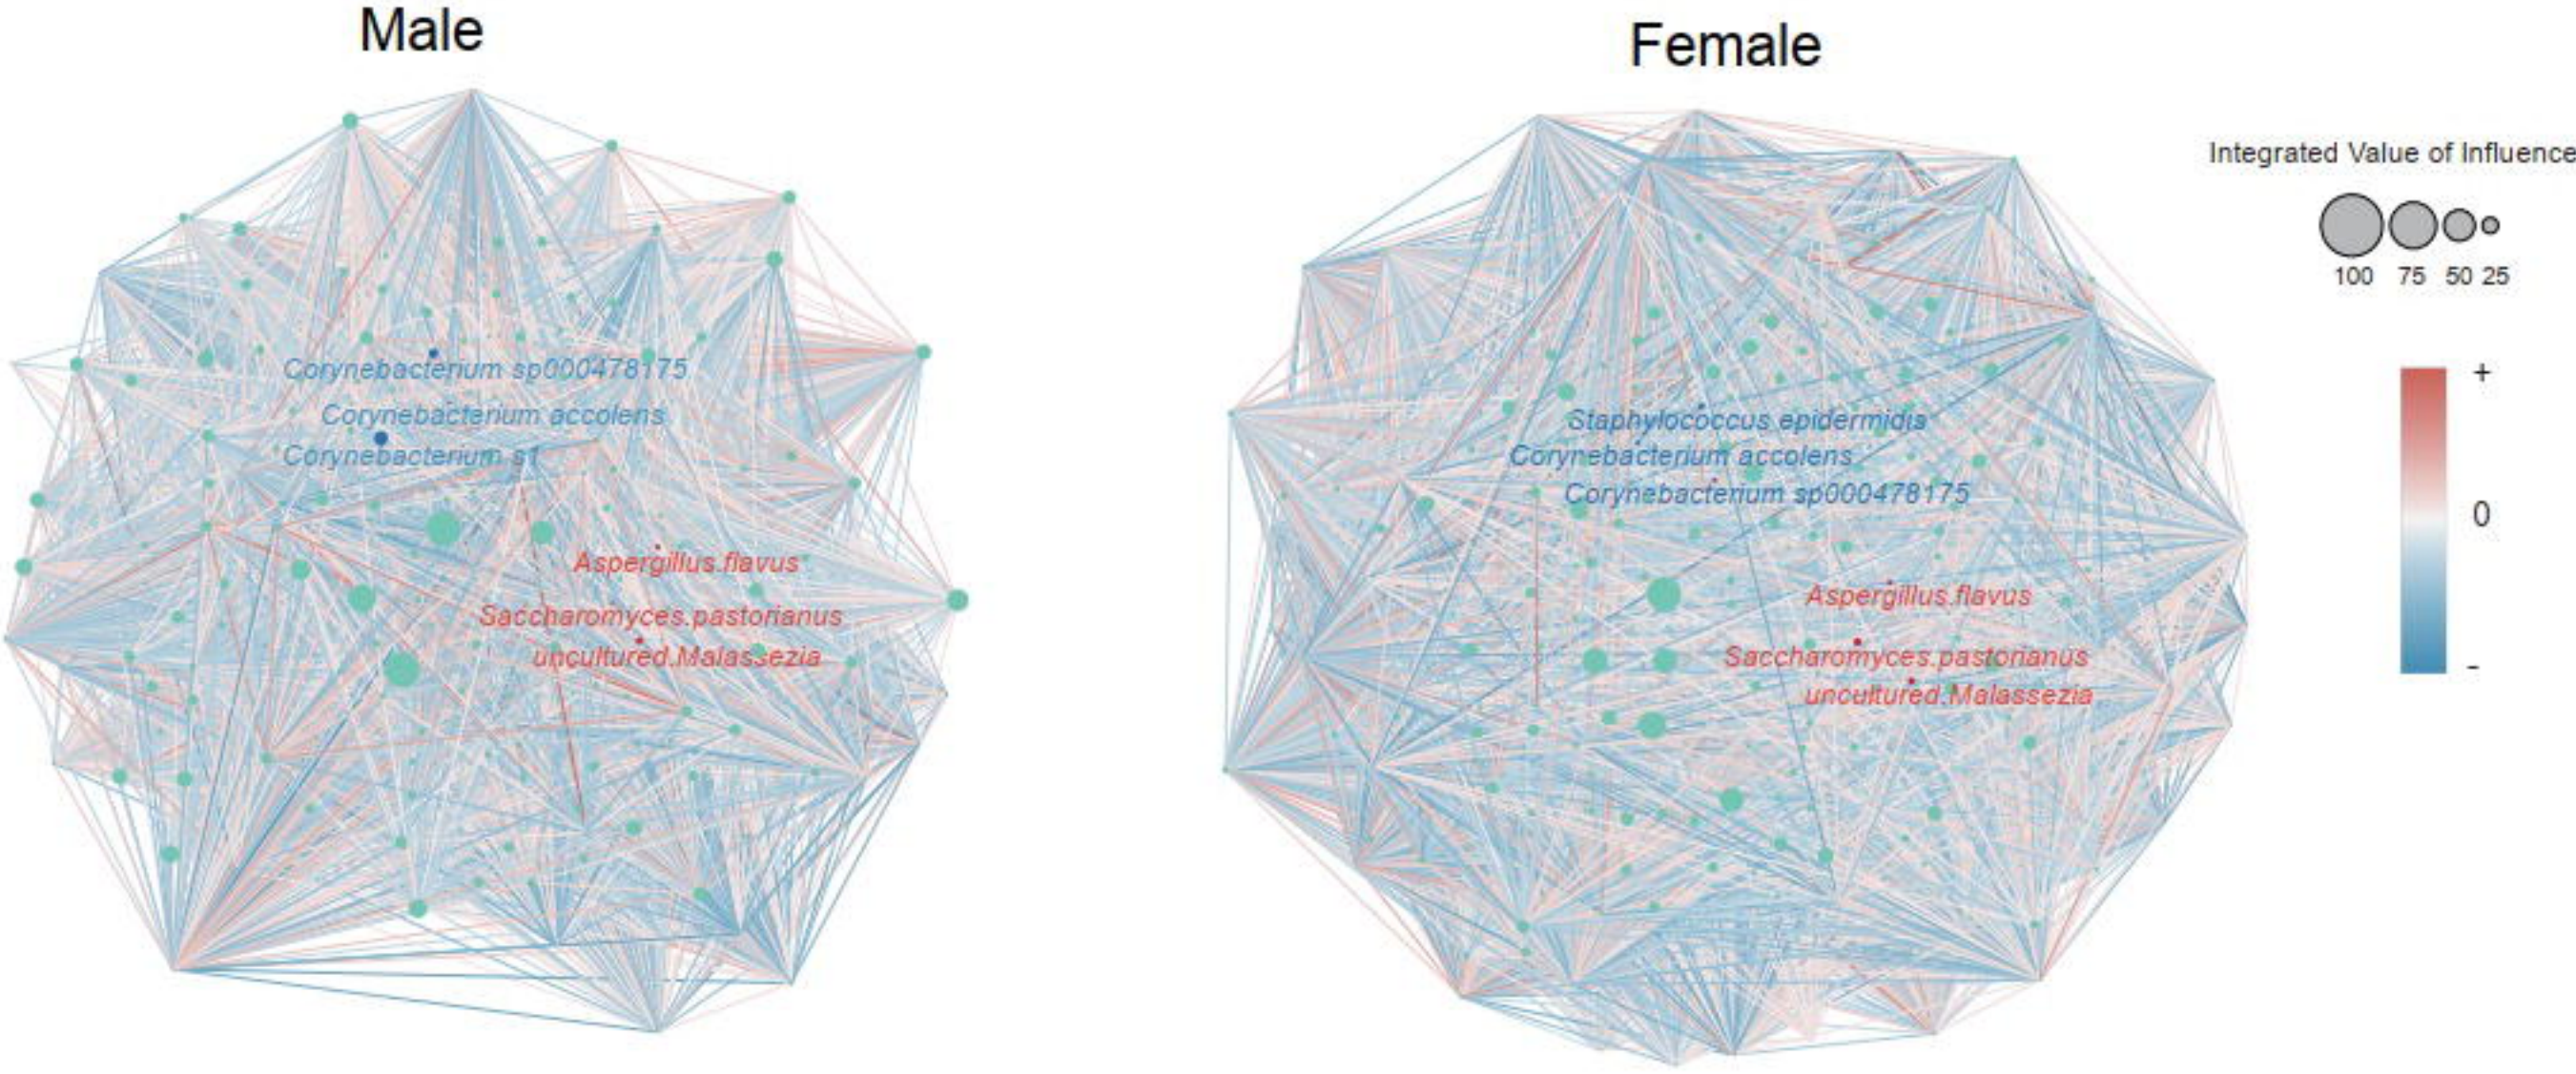

b

|                                                                        | Male              | Female            |
|------------------------------------------------------------------------|-------------------|-------------------|
| Total no. of microbes in the entire network (no. of nodes)             | 258               | 258               |
| Total no. of interactions in the entire network (no. of edges)         | 41,526            | 42,062            |
| Negative interactions of the entire network                            | 21726/41526 (52%) | 22766/42062 (54%) |
| Negative interactions of the bacterial-domain sub-network              | 3048/7928 (38%)   | 2436/6676 (36%)   |
| Negative interactions of the fungal-domain sub-network                 | 4434/13030 (34%)  | 6082/14374 (42%)  |
| Negative interactions of the cross-domain (bacteria-fungi) sub-network | 14244/20568 (69%) | 14248/21012 (68%) |

c

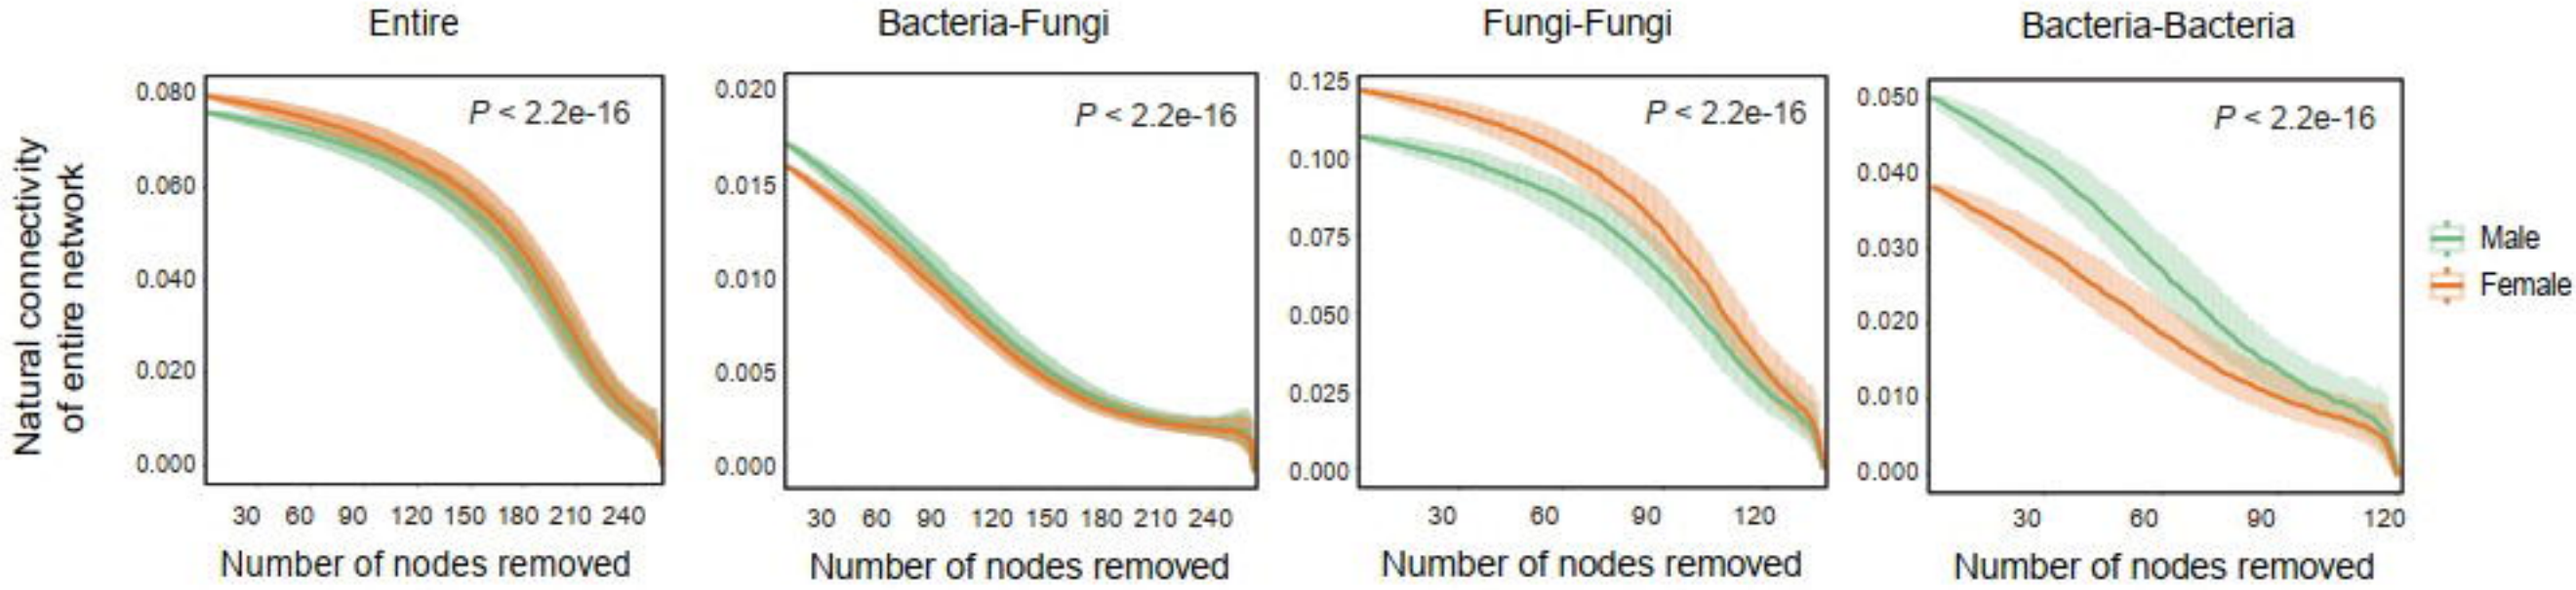

d

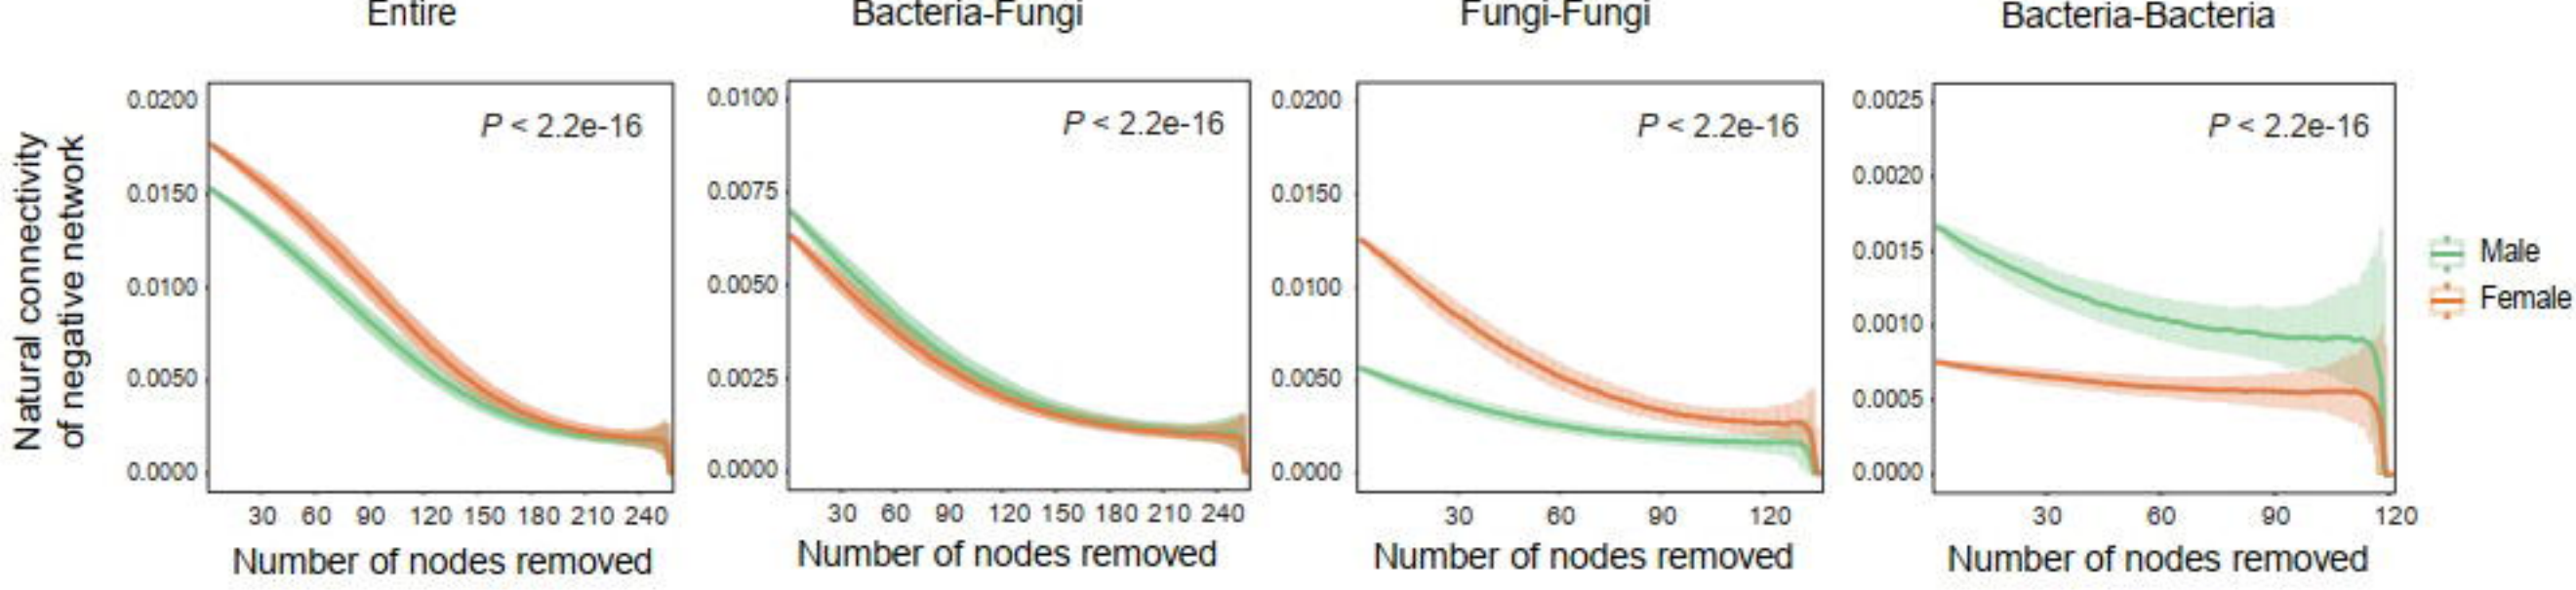



a

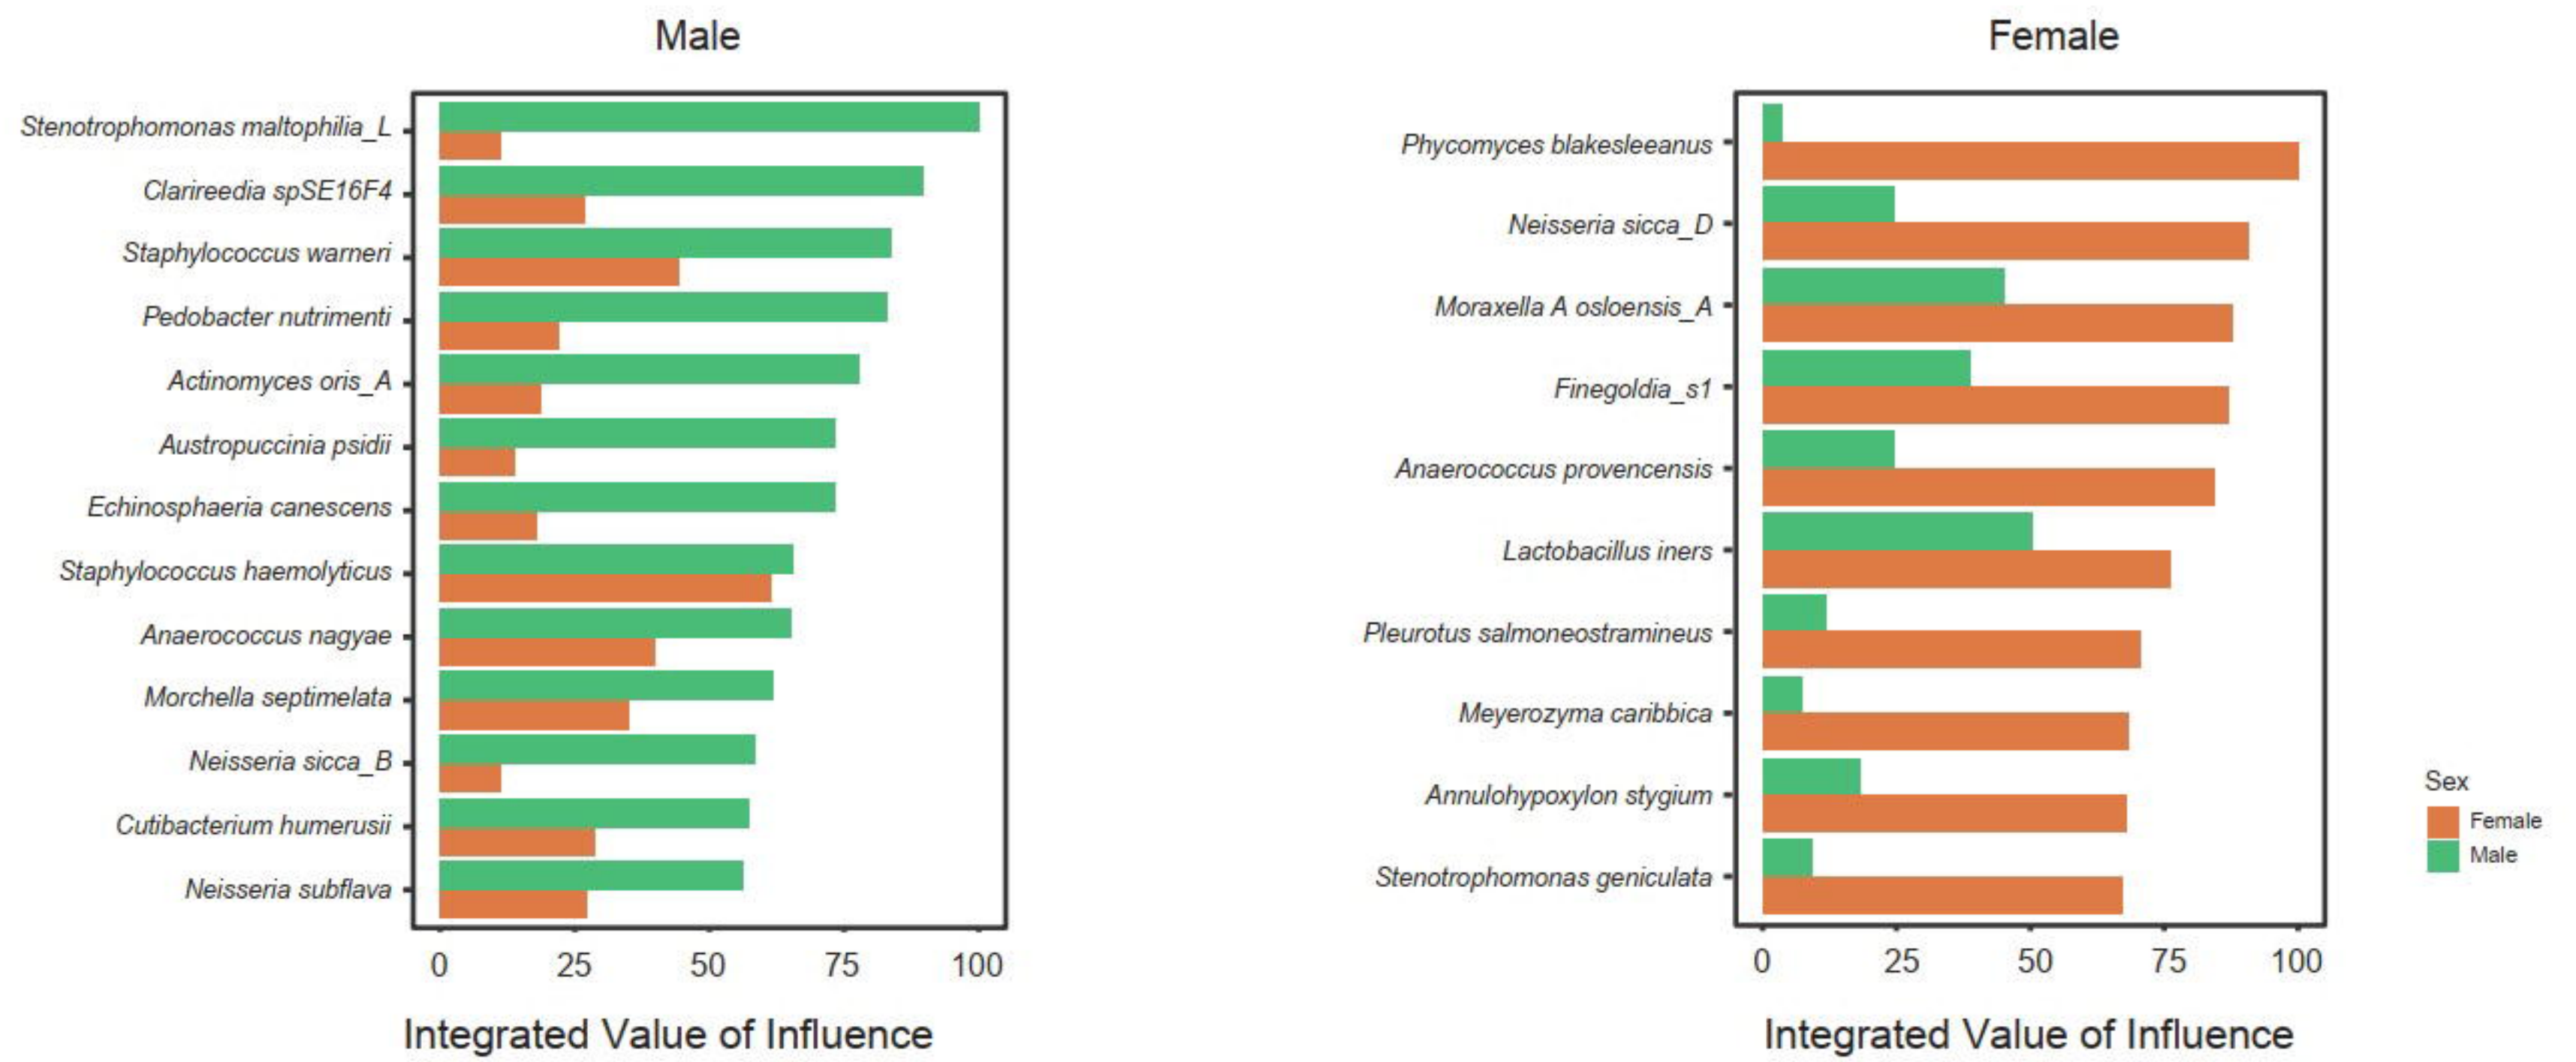

b

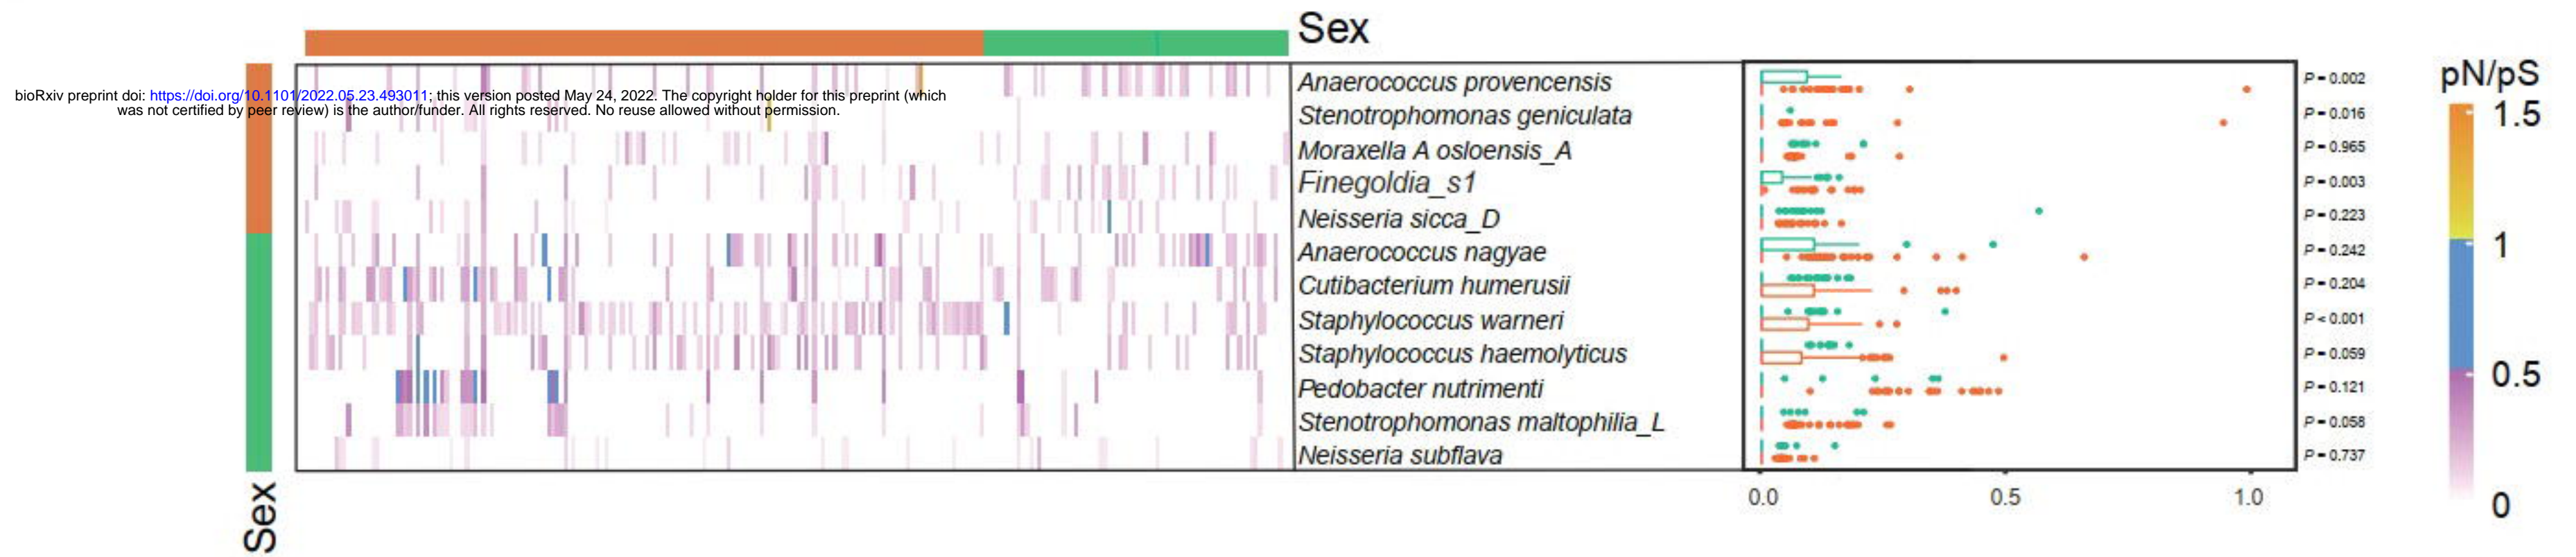

c

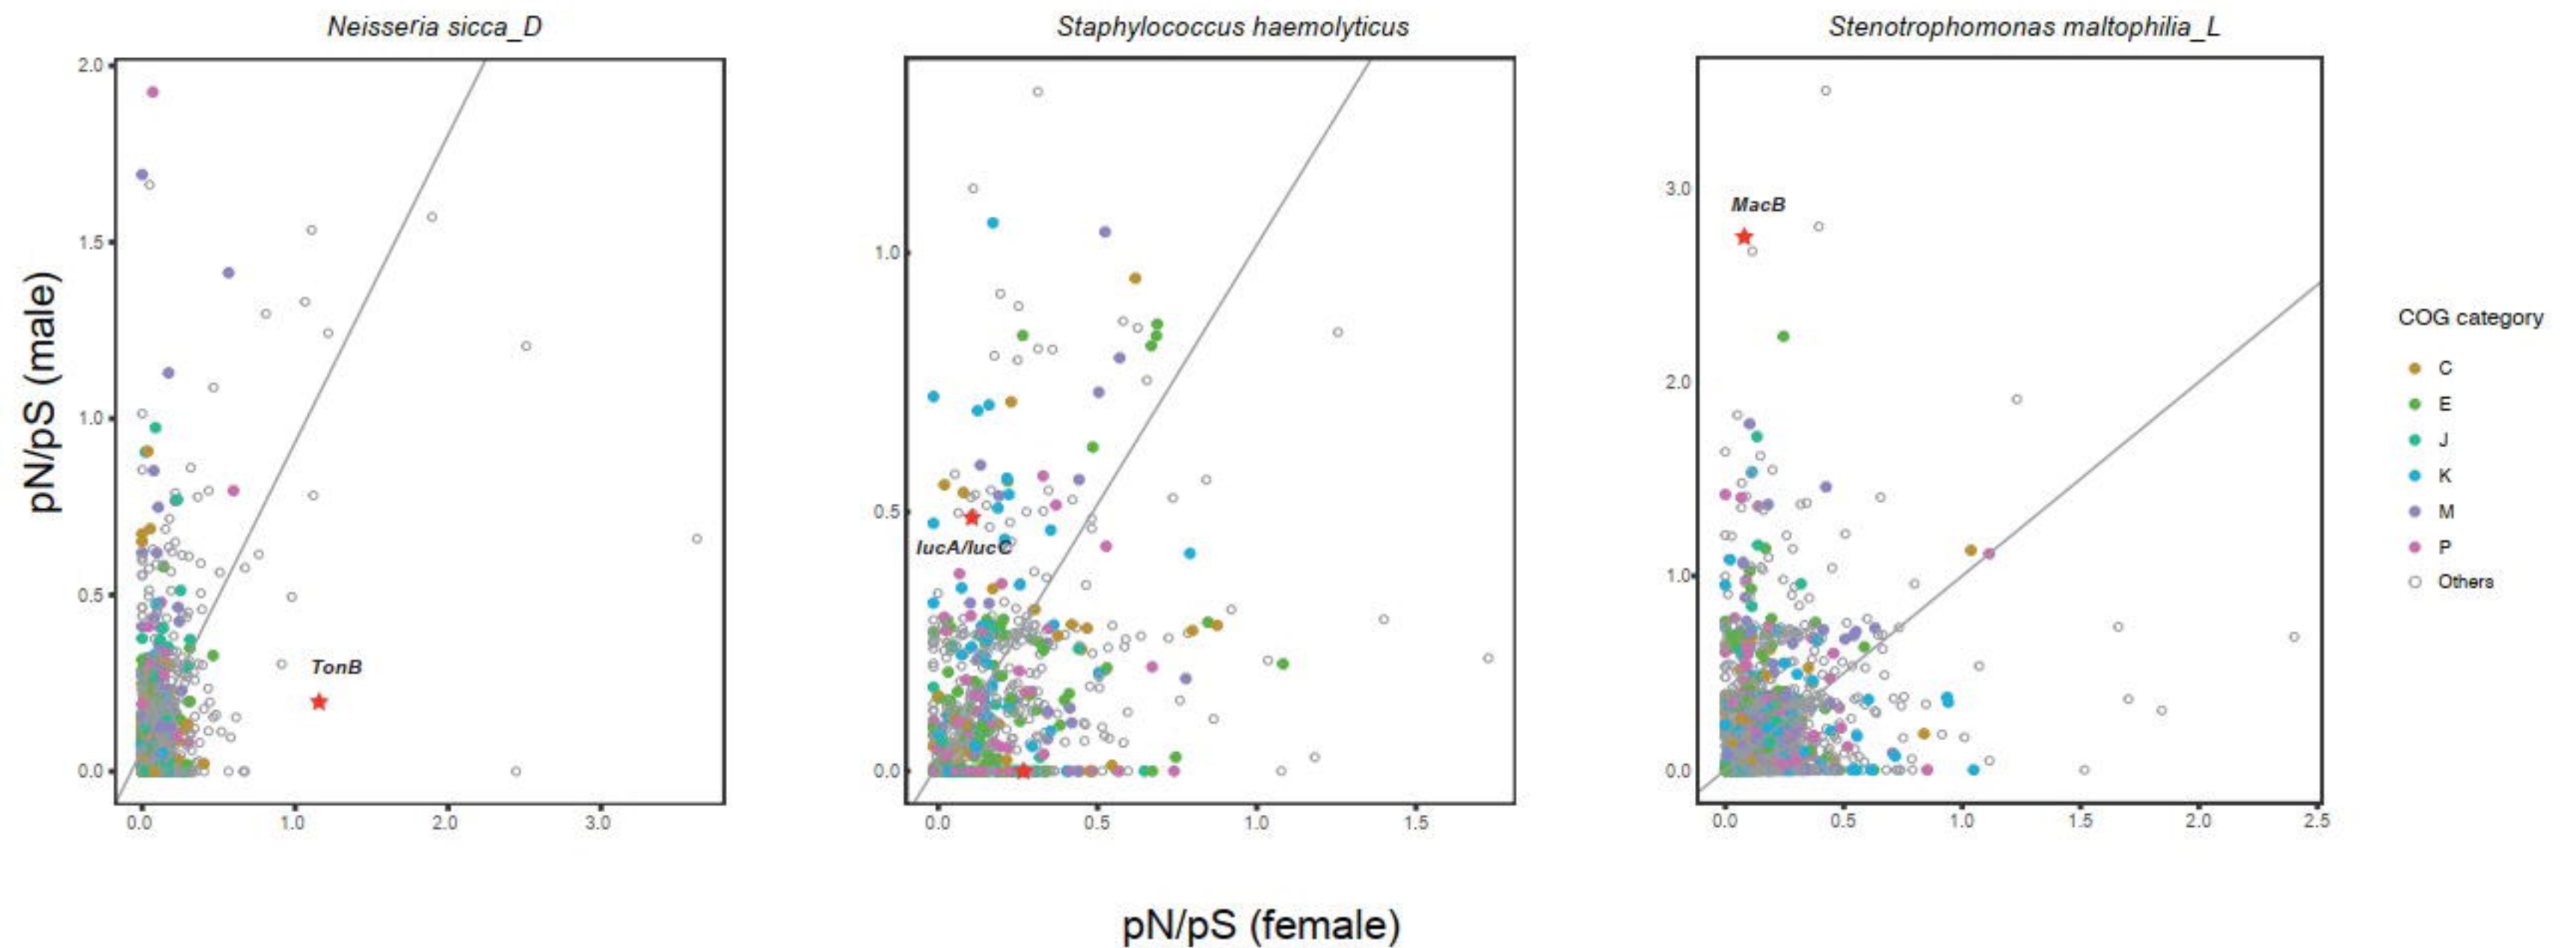

Source: https://www.biorxiv.org/content/10.1101/2022.05.23.493011v1.full.pdf
